# Supplementary material for: Four New Diterpenoids from the South China Sea Soft Coral Sinularia nanolobata and DFT-Based Structure Elucidation
Source: MDPI journal article supplement (doi:10.3390/molecules28196892), 2023-09-30
Supplement: s1 [file s1]

# Four New Diterpenoids from the South China Sea Soft Coral *Sinularia nanolobata* and DFT-Based Structure Elucidation

Dan-Dan Yu <sup>1</sup>, Lin-Mao Ke <sup>1</sup>, Jiao Liu <sup>2</sup>, Song-Wei Li <sup>3</sup>, Ming-Zhi Su <sup>4</sup>, Li-Gong Yao <sup>2,4</sup>, Hui Luo <sup>1,\*</sup> and Yue-Wei Guo <sup>2,3,4,\*</sup>

<sup>1</sup> College of Pharmacy, Guangdong Medical University, Zhanjiang 524023, China; ddyu@baridd.ac.cn (D.-D.Y.); klm102198@163.com (L.-M.K.)

<sup>2</sup> State Key Laboratory of Drug Research, Shanghai Institute of Materia Medica, Chinese Academy of Sciences, Shanghai 201203, China; 201728012342081@simmm.ac.cn (J.L.); yaoligong@simmm.ac.cn (L.-G.Y.)

<sup>3</sup> School of Medicine, Shanghai University, Baoshan District, Shanghai 200444, China; simmswli@163.com

<sup>4</sup> Shandong Laboratory of Yantai Drug Discovery, Bohai Rim Advanced Research Institute for Drug Discovery, Yantai 264117, China; smz0310@163.com

\* Correspondence: luohui@gdmu.edu.cn (H.L.); ywguo@simmm.ac.cn (Y.-W.G.)

## Content

|                                                                                                     |           |
|-----------------------------------------------------------------------------------------------------|-----------|
| <b>1. Original spectra of 1</b>                                                                     | <b>3</b>  |
| Figure S1a. <sup>1</sup> H NMR spectrum (600 MHz) of <b>1</b> in CDCl <sub>3</sub>                  | 3         |
| Figure S1b. DEPT135/ <sup>13</sup> C NMR spectrum (150 MHz) of <b>1</b> in CDCl <sub>3</sub>        | 3         |
| Figure S1c. HSQC spectrum (600 MHz) of <b>1</b> in CDCl <sub>3</sub>                                | 4         |
| Figure S1d. <sup>1</sup> H- <sup>1</sup> H COSY spectrum of (600 MHz) <b>1</b> in CDCl <sub>3</sub> | 4         |
| Figure S1e. HMBC spectrum (600 MHz) of <b>1</b> in CDCl <sub>3</sub>                                | 5         |
| Figure S1f. NOESY spectrum (600 MHz) of <b>1</b> in CDCl <sub>3</sub>                               | 5         |
| Figure S1g. HR-EIMS of <b>1</b>                                                                     | 6         |
| Figure S1h. IR spectrum of <b>1</b>                                                                 | 6         |
| Figure S1i. ECD and UV spectra of <b>1</b>                                                          | 7         |
| <b>2. Original spectra of 2</b>                                                                     | <b>8</b>  |
| Figure S2a. <sup>1</sup> H NMR spectrum (600 MHz) of <b>2</b> in CDCl <sub>3</sub>                  | 8         |
| Figure S2b. DEPT135/ <sup>13</sup> C NMR spectrum (150 MHz) of <b>2</b> in CDCl <sub>3</sub>        | 8         |
| Figure S2c. HSQC spectrum (600 MHz) of <b>2</b> in CDCl <sub>3</sub>                                | 9         |
| Figure S2d. <sup>1</sup> H- <sup>1</sup> H COSY spectrum (600 MHz) of <b>2</b> in CDCl <sub>3</sub> | 9         |
| Figure S2e. HMBC spectrum (600 MHz) of <b>2</b> in CDCl <sub>3</sub>                                | 10        |
| Figure S2f. NOESY spectrum (600 MHz) of <b>2</b> in CDCl <sub>3</sub>                               | 10        |
| Figure S2g. HR-EIMS of <b>2</b>                                                                     | 11        |
| Figure S2h. IR spectrum of <b>2</b>                                                                 | 11        |
| Figure S2i. ECD and UV spectra of <b>2</b>                                                          | 12        |
| <b>3. Original spectra of 3</b>                                                                     | <b>13</b> |
| Figure S3a. <sup>1</sup> H NMR spectrum (600 MHz) of <b>3</b> in CDCl <sub>3</sub>                  | 13        |
| Figure S3b. DEPT135/ <sup>13</sup> C NMR spectrum (150 MHz) of <b>3</b> in CDCl <sub>3</sub>        | 13        |
| Figure S3c. HSQC spectrum (600 MHz) of <b>3</b> in CDCl <sub>3</sub>                                | 14        |
| Figure S3d. <sup>1</sup> H- <sup>1</sup> H COSY spectrum (600 MHz) of <b>3</b> in CDCl <sub>3</sub> | 14        |
| Figure S3e. HMBC spectrum (600 MHz) of <b>3</b> in CDCl <sub>3</sub>                                | 15        |
| Figure S3f. NOESY spectrum (600 MHz) of <b>3</b> in CDCl <sub>3</sub>                               | 15        |
| Figure S3g. HR-EIMS of <b>3</b>                                                                     | 16        |
| Figure S3h. IR spectrum of <b>3</b>                                                                 | 16        |
| Figure S3i. ECD and UV spectra of <b>3</b>                                                          | 17        |
| <b>4. Original spectra of 4</b>                                                                     | <b>18</b> |
| Figure S4a. <sup>1</sup> H NMR spectrum (600 MHz) of <b>4</b> in CDCl <sub>3</sub>                  | 18        |
| Figure S4b. DEPT135/ <sup>13</sup> C NMR spectrum (150 MHz) of <b>4</b> in CDCl <sub>3</sub>        | 18        |
| Figure S4c. HSQC spectrum (600 MHz) of <b>4</b> in CDCl <sub>3</sub>                                | 19        |
| Figure S4d. <sup>1</sup> H- <sup>1</sup> H COSY spectrum (600 MHz) of <b>4</b> in CDCl <sub>3</sub> | 19        |
| Figure S4e. HMBC spectrum (600 MHz) of <b>4</b> in CDCl <sub>3</sub>                                | 20        |

|                                                                                                                                                                                              |           |
|----------------------------------------------------------------------------------------------------------------------------------------------------------------------------------------------|-----------|
| <b>Figure S4f.</b> NOESY spectrum (600 MHz) of <b>4</b> in CDCl <sub>3</sub> .....                                                                                                           | <b>20</b> |
| <b>Figure S4g.</b> HR-EIMS of <b>4</b> .....                                                                                                                                                 | <b>21</b> |
| <b>Figure S4h.</b> IR spectrum of <b>4</b> .....                                                                                                                                             | <b>21</b> |
| <b>Figure S4i.</b> ECD and UV spectra of <b>4</b> .....                                                                                                                                      | <b>21</b> |
| <b>5. QM-NMR calculation and DP4+ analysis of compound 3</b> .....                                                                                                                           | <b>22</b> |
| <b>Figure S5a.</b> Structures of studied isomers for compound <b>3</b> .....                                                                                                                 | <b>22</b> |
| <b>Figure S5b.</b> DP4+ results obtained using experimental data of <b>3</b> <i>versus</i> isomers 1 ( <b>3a</b> ) and 2 ( <b>3b</b> )<br>.....                                              | <b>22</b> |
| <b>6. TDDFT-ECD calculations of compounds 1-4</b> .....                                                                                                                                      | <b>23</b> |
| <b>Figure S6a.</b> Experimental ECD curve of <b>1</b> , and calculated ECD spectrum of (12 <i>S</i> )- <b>1</b> .....                                                                        | <b>23</b> |
| <b>Figure S6b.</b> Experimental ECD curve of <b>2</b> , and calculated ECD spectrum of (11 <i>R</i> ,12 <i>R</i> )- <b>2</b> .....                                                           | <b>23</b> |
| <b>Figure S6c.</b> Experimental ECD curve of <b>3</b> , and calculated ECD spectrum of (4 <i>S</i> ,10 <i>R</i> ,12 <i>R</i> )- <b>3</b> .                                                   | <b>24</b> |
| <b>Figure S6d.</b> Experimental ECD curve of <b>4</b> , and calculated ECD spectrum of (1 <i>S</i> , 2 <i>R</i> )- <b>4</b> .....                                                            | <b>24</b> |
| <b>Figure S6e.</b> Re-optimized conformers of (12 <i>S</i> )- <b>1</b> calculated at the B3LYP/6-311G(d,p) level with IEFPCM solvent model for acetonitrile. ....                            | <b>27</b> |
| <b>Figure S6f.</b> Re-optimized conformers of (11 <i>R</i> , 12 <i>R</i> )- <b>2</b> calculated at the B3LYP/6-311G(d,p) level with IEFPCM solvent model for acetonitrile. ....              | <b>30</b> |
| <b>Figure S6g.</b> Re-optimized conformers of (4 <i>S</i> , 11 <i>R</i> , 12 <i>R</i> )- <b>3</b> calculated at the B3LYP/6-311G(d,p) level with IEFPCM solvent model for acetonitrile. .... | <b>33</b> |
| <b>Figure S6h.</b> Re-optimized conformers of (1 <i>S</i> , 2 <i>R</i> )- <b>4</b> calculated at the B3LYP/6-311G(d,p) level with IEFPCM solvent model for acetonitrile. ....                | <b>35</b> |

## 1. Original spectra of 1

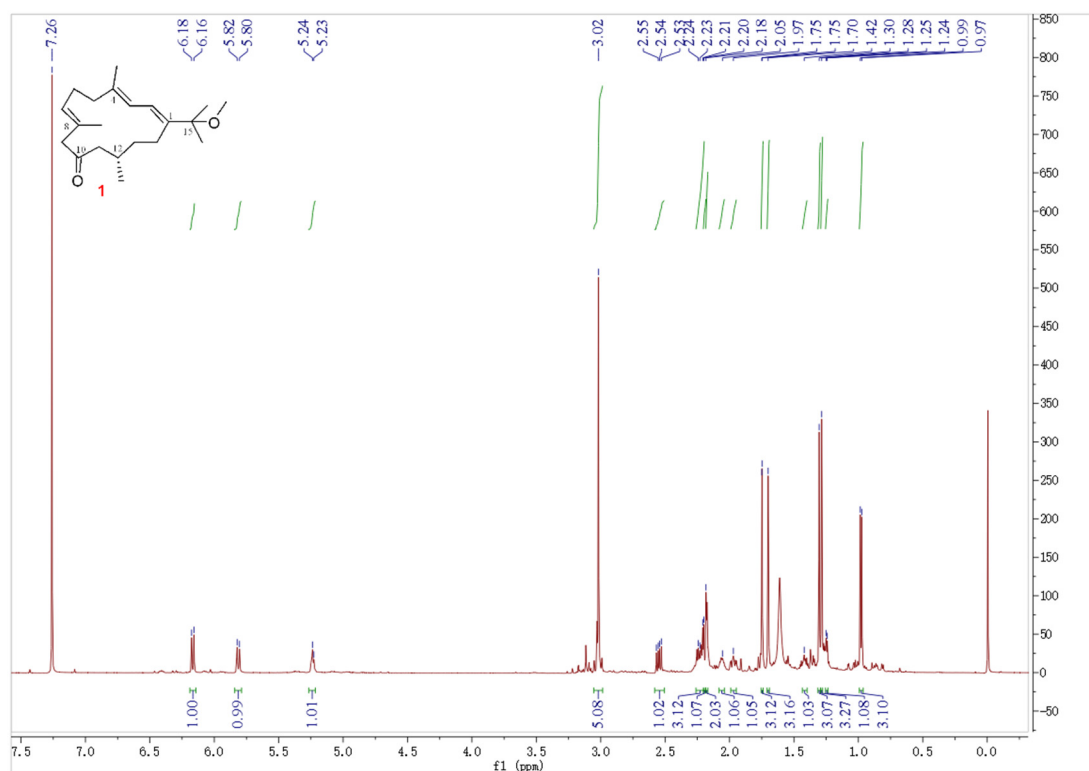

**Figure S1a.**  $^1\text{H}$  NMR spectrum (600 MHz) of **1** in  $\text{CDCl}_3$

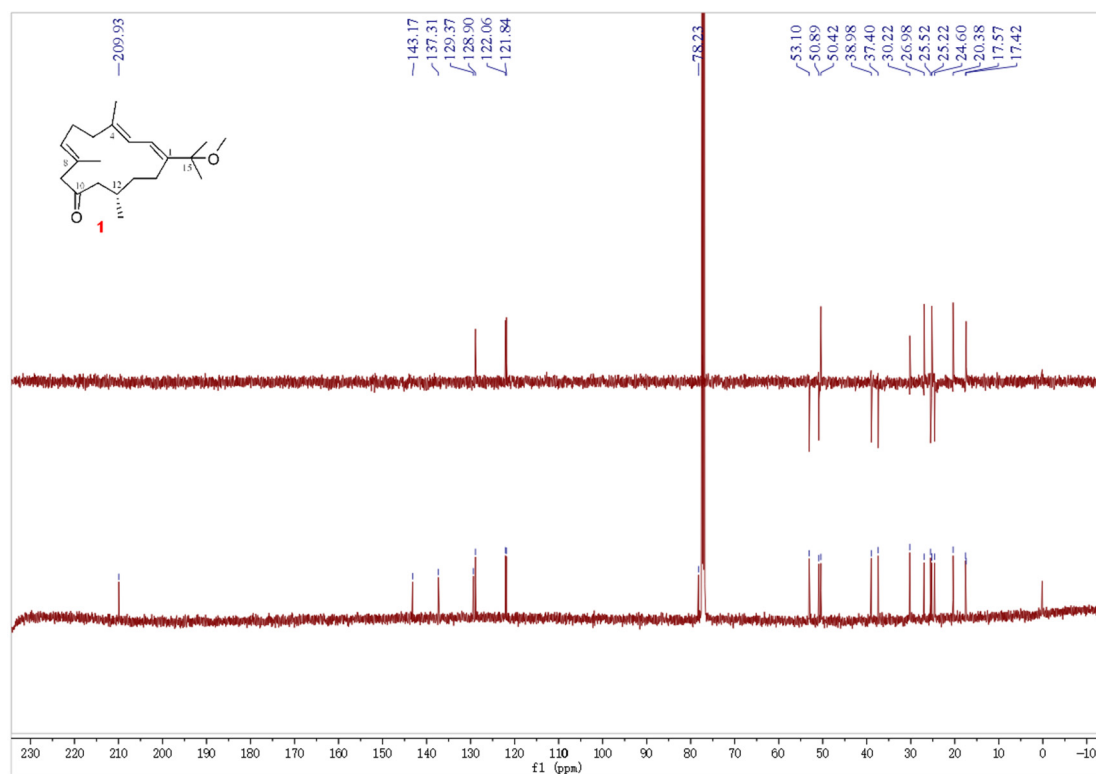

**Figure S1b.** DEPT135/<sup>13</sup>C NMR spectrum (150 MHz) of **1** in CDCl<sub>3</sub>

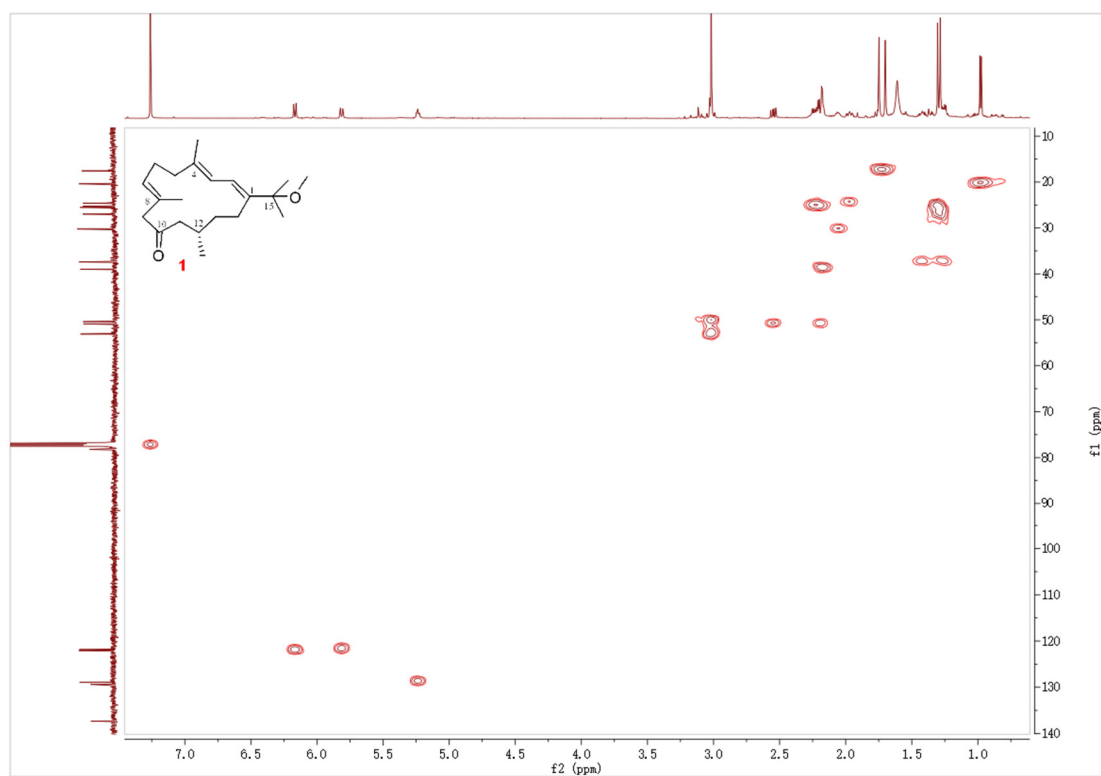

**Figure S1c.** HSQC spectrum (600 MHz) of **1** in CDCl<sub>3</sub>

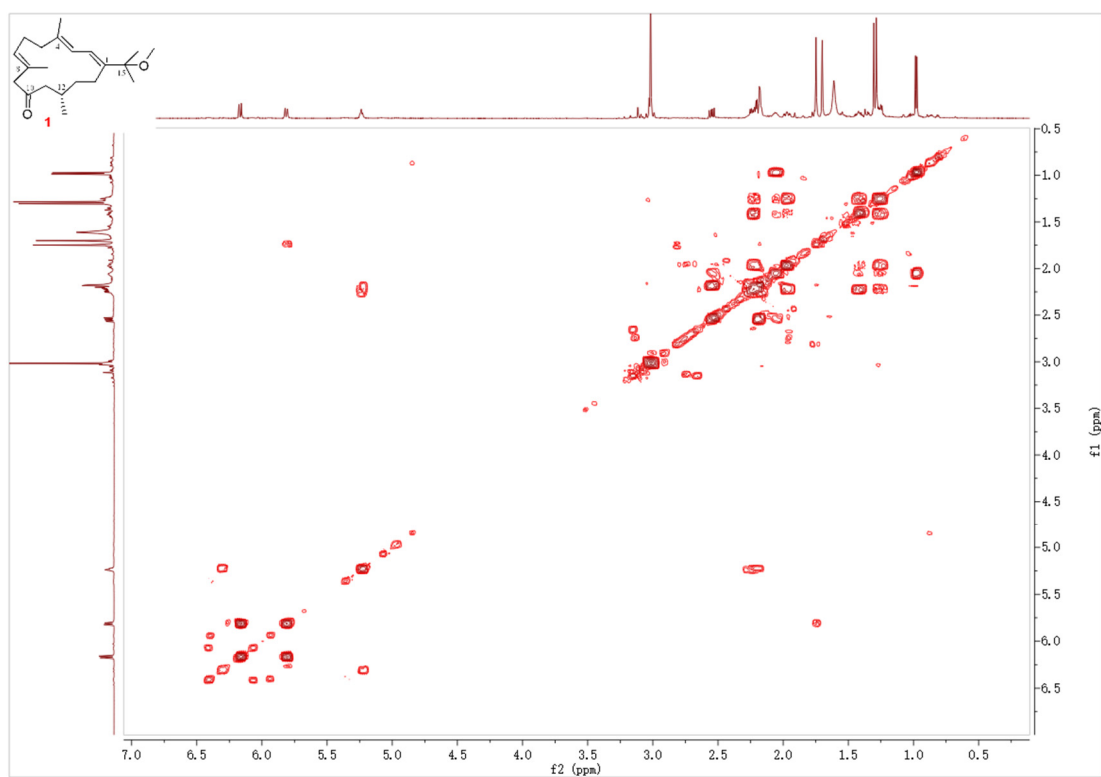

**Figure S1d.** <sup>1</sup>H-<sup>1</sup>H COSY spectrum of (600 MHz) **1** in CDCl<sub>3</sub>

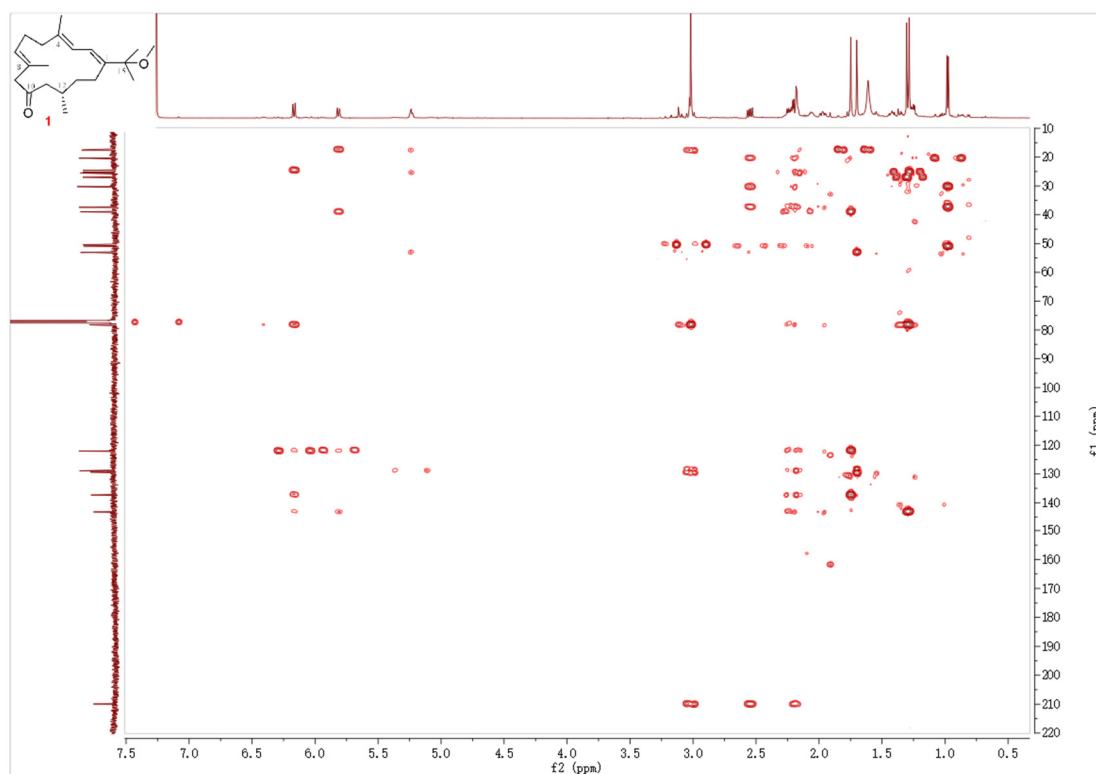

**Figure S1e.** HMBC spectrum (600 MHz) of **1** in  $\text{CDCl}_3$

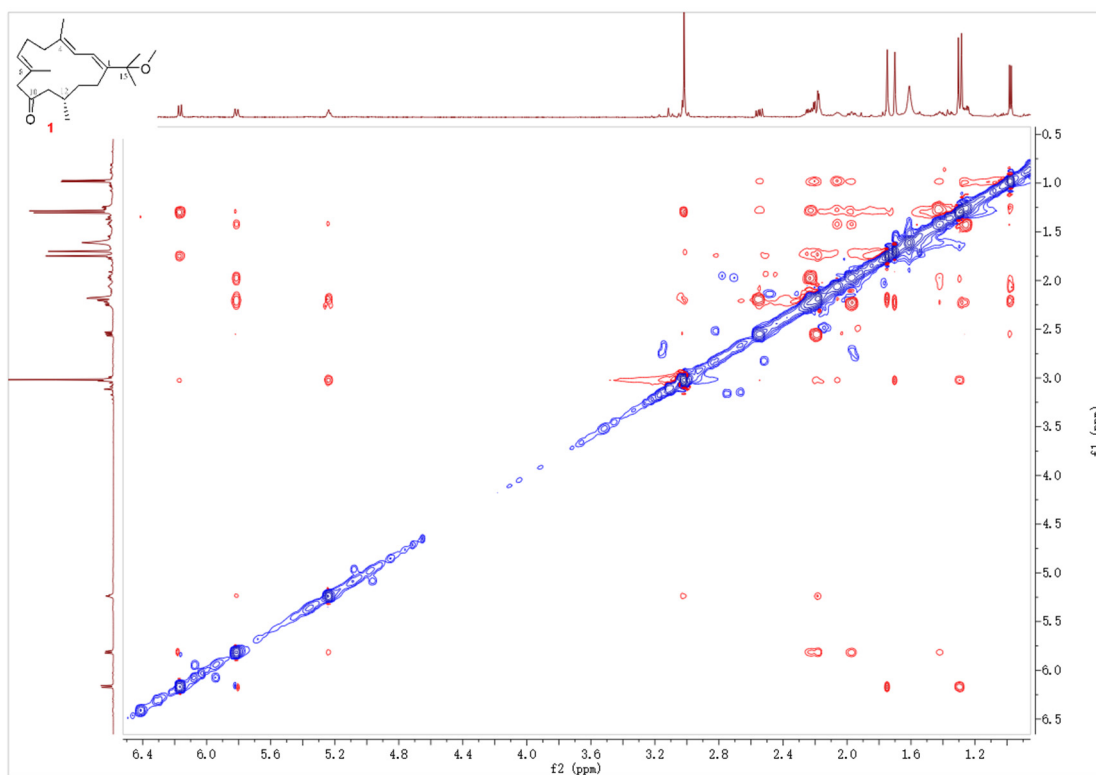

**Figure S1f.** NOESY spectrum (600 MHz) of **1** in  $\text{CDCl}_3$

EI202101492\_A8-11-212 -c1#8 RT: 1.45

T: + c EI Full ms [ 49.50-800.50]

m/z= 48-803

| m/z      | Intensity  | Relative | Theo.<br>Mass | Delta<br>(mmu) | RDB<br>equiv. | Composition                                    |
|----------|------------|----------|---------------|----------------|---------------|------------------------------------------------|
| 53.0360  | 5522373.0  | 10.33    | 53.0386       | -2.59          | 2.5           | C <sub>4</sub> H <sub>5</sub>                  |
| 59.0521  | 9796096.0  | 18.32    | 59.0491       | 2.95           | 0.5           | C <sub>3</sub> H <sub>7</sub> O <sub>1</sub>   |
| 68.0283  | 5616952.0  | 10.50    | 68.0257       | 2.64           | 3.0           | C <sub>4</sub> H <sub>4</sub> O <sub>1</sub>   |
| 69.0307  | 7610319.0  | 14.23    | 69.0335       | -2.82          | 2.5           | C <sub>4</sub> H <sub>5</sub> O <sub>1</sub>   |
| 134.0143 | 8123842.0  | 15.19    | 134.0151      | -0.84          | 11.0          | C <sub>11</sub> H <sub>2</sub>                 |
| 135.0229 | 8519424.0  | 15.93    | 135.0229      | 0.01           | 10.5          | C <sub>11</sub> H <sub>3</sub>                 |
| 136.0298 | 3171483.0  | 5.93     | 136.0308      | -0.94          | 10.0          | C <sub>11</sub> H <sub>4</sub>                 |
| 139.0175 | 2208021.0  | 4.13     | 139.0178      | -0.32          | 9.5           | C <sub>10</sub> H <sub>3</sub> O <sub>1</sub>  |
| 146.0138 | 2225156.0  | 4.16     | 146.0151      | -1.26          | 12.0          | C <sub>12</sub> H <sub>2</sub>                 |
| 147.0233 | 11288576.0 | 21.11    | 147.0229      | 0.39           | 11.5          | C <sub>12</sub> H <sub>3</sub>                 |
| 148.0301 | 5240100.0  | 9.80     | 148.0308      | -0.63          | 11.0          | C <sub>12</sub> H <sub>4</sub>                 |
| 149.0028 | 2527776.0  | 4.73     | 149.0022      | 0.58           | 11.5          | C <sub>11</sub> H <sub>1</sub> O <sub>1</sub>  |
| 149.0388 | 3180829.0  | 5.95     | 149.0386      | 0.26           | 10.5          | C <sub>12</sub> H <sub>5</sub>                 |
| 150.0102 | 1820614.0  | 3.40     | 150.0100      | 0.19           | 11.0          | C <sub>11</sub> H <sub>2</sub> O <sub>1</sub>  |
| 151.0183 | 11781120.0 | 22.03    | 151.0178      | 0.48           | 10.5          | C <sub>11</sub> H <sub>3</sub> O <sub>1</sub>  |
| 152.0261 | 16571904.0 | 30.98    | 152.0257      | 0.45           | 10.0          | C <sub>11</sub> H <sub>4</sub> O <sub>1</sub>  |
| 153.0317 | 3542740.0  | 6.62     | 153.0335      | -1.77          | 9.5           | C <sub>11</sub> H <sub>5</sub> O <sub>1</sub>  |
| 169.0091 | 1316725.0  | 2.46     | 169.0073      | 1.81           | 14.5          | C <sub>14</sub> H <sub>1</sub>                 |
| 190.0433 | 1216805.0  | 2.28     | 190.0413      | 1.96           | 12.0          | C <sub>14</sub> H <sub>6</sub> O <sub>1</sub>  |
| 219.1761 | 1700920.0  | 3.18     | 219.1743      | 1.79           | 4.5           | C <sub>15</sub> H <sub>23</sub> O <sub>1</sub> |
| 243.1728 | 4137424.0  | 7.74     | 243.1743      | -1.54          | 6.5           | C <sub>17</sub> H <sub>23</sub> O <sub>1</sub> |
| 244.1794 | 1968570.0  | 3.68     | 244.1822      | -2.79          | 6.0           | C <sub>17</sub> H <sub>24</sub> O <sub>1</sub> |
| 253.1939 | 2065724.0  | 3.86     | 253.1951      | -1.15          | 7.5           | C <sub>19</sub> H <sub>25</sub>                |
| 268.2195 | 3925759.0  | 7.34     | 268.2186      | 0.95           | 7.0           | C <sub>20</sub> H <sub>28</sub>                |
| 271.2059 | 3956501.0  | 7.40     | 271.2056      | 0.25           | 6.5           | C <sub>19</sub> H <sub>27</sub> O <sub>1</sub> |
| 286.2271 | 18204672.0 | 34.04    | 286.2291      | -2.03          | 6.0           | C <sub>20</sub> H <sub>30</sub> O <sub>1</sub> |
| 303.2315 | 13577216.0 | 25.39    | 303.2319      | -0.32          | 5.5           | C <sub>20</sub> H <sub>31</sub> O <sub>2</sub> |
| 318.2554 | 1773309.0  | 3.32     | 318.2553      | 0.05           | 5.0           | C <sub>21</sub> H <sub>34</sub> O <sub>2</sub> |

Figure S1g. HR-EIMS of 1

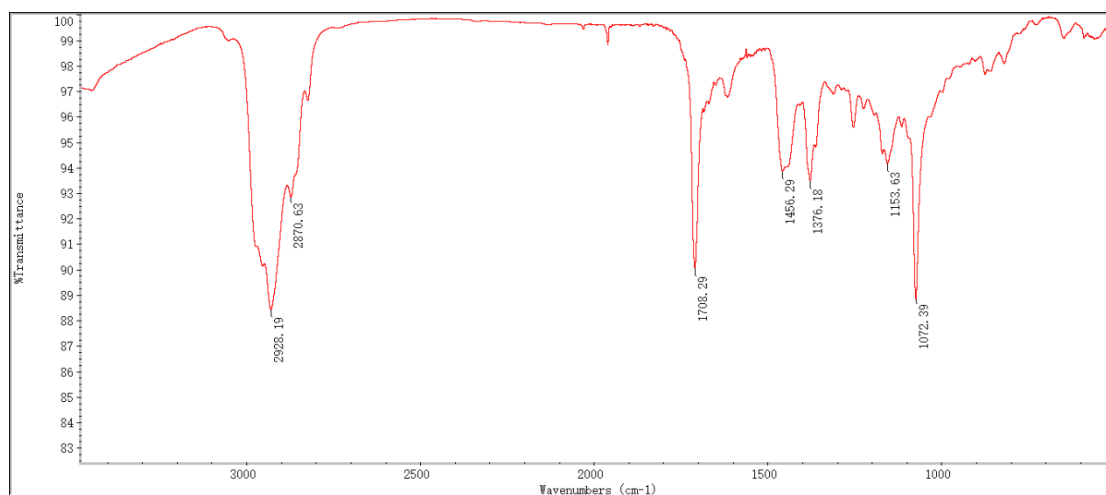

Figure S1h. IR spectrum of 1

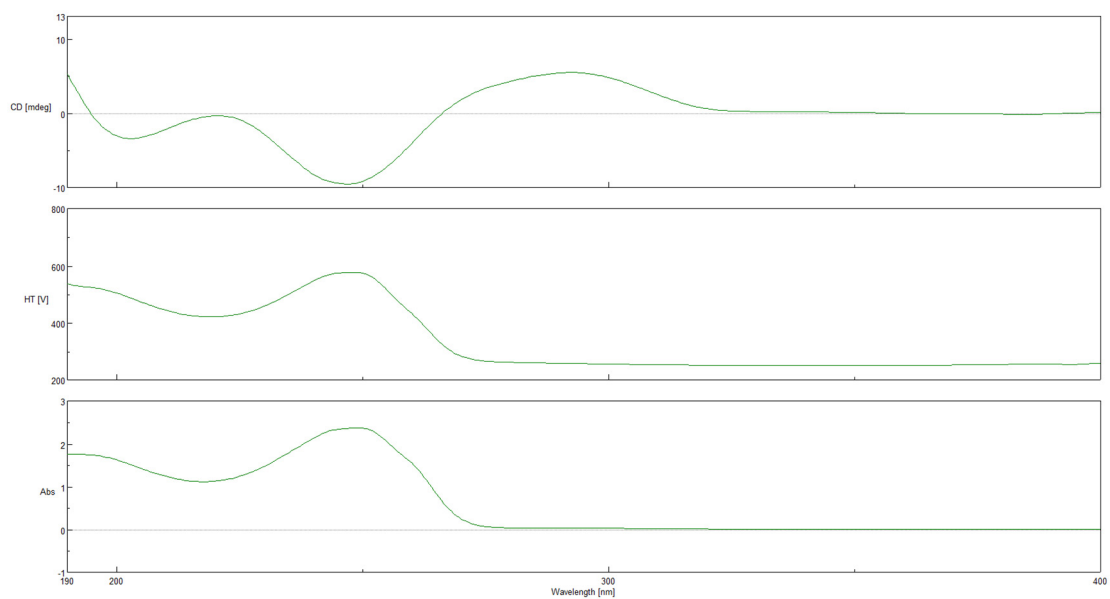

**Figure S2i.** ECD and UV spectra of **1**

## 2. Original spectra of 2

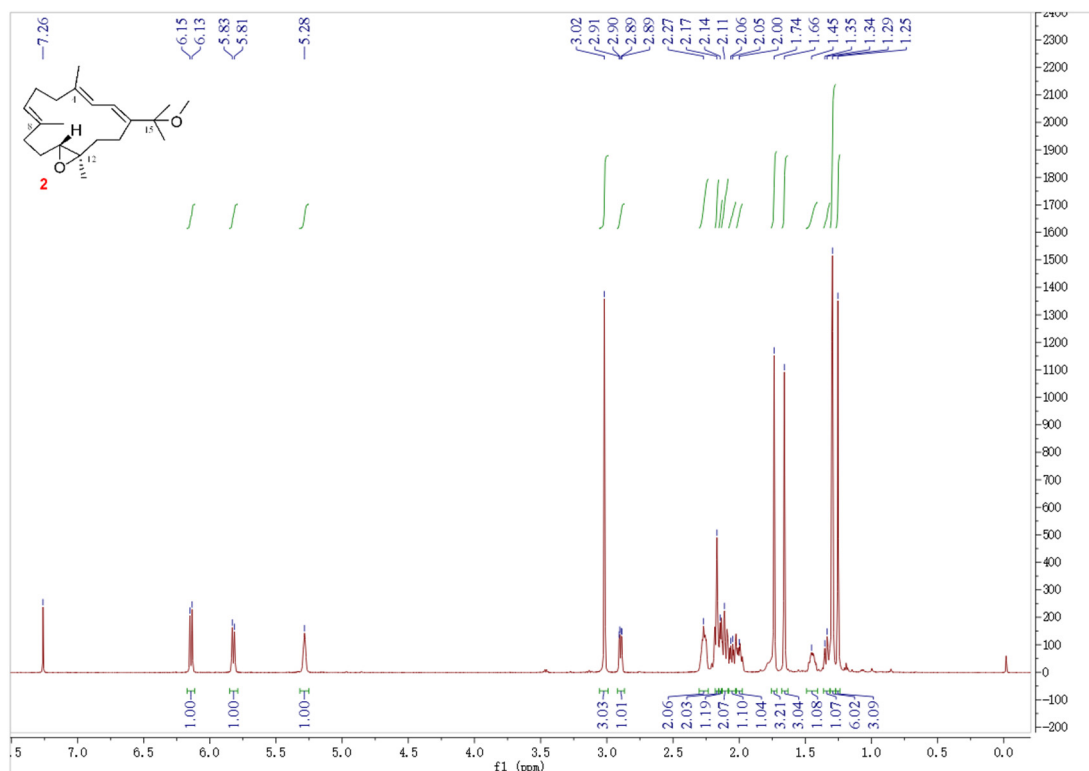

**Figure S2a.**  $^1\text{H}$  NMR spectrum (600 MHz) of **2** in  $\text{CDCl}_3$

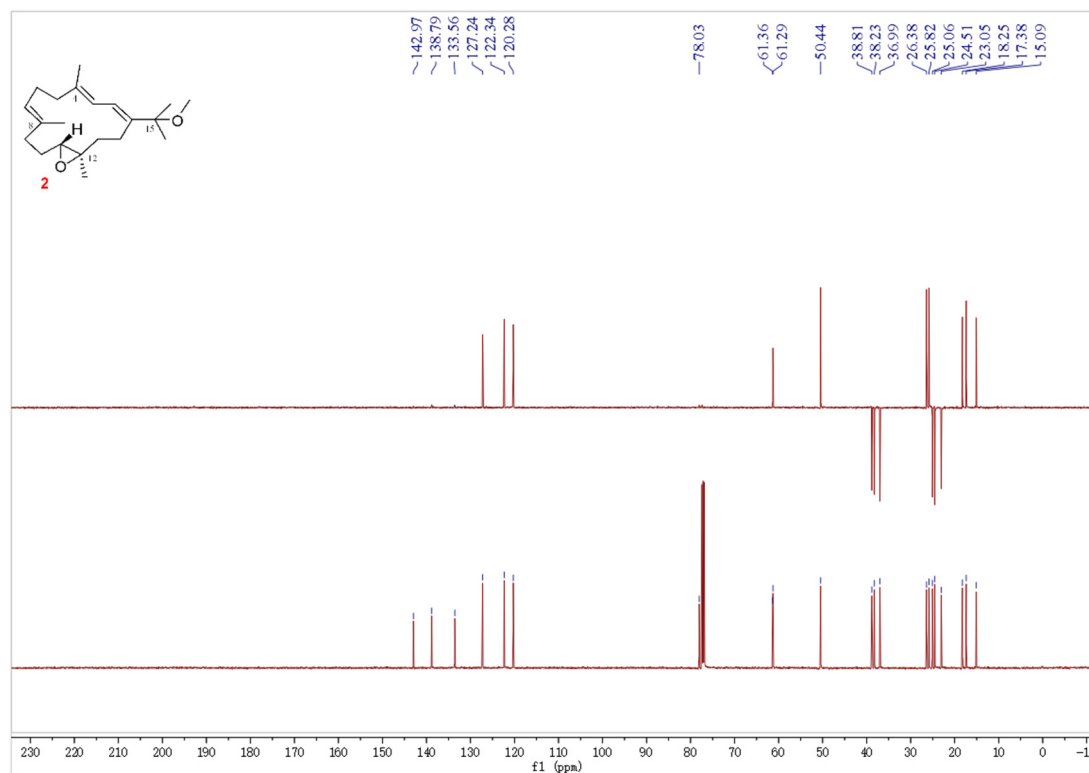

**Figure S2b.** DEPT135/<sup>13</sup>C NMR spectrum (150 MHz) of **2** in CDCl<sub>3</sub>

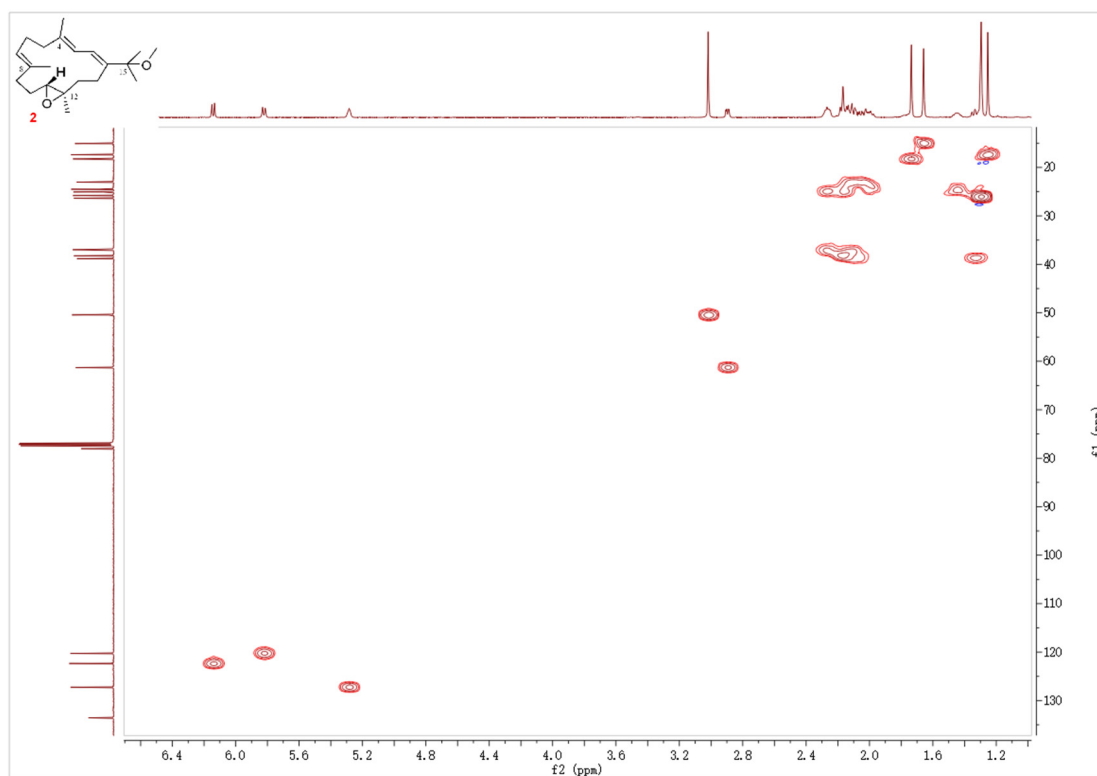

**Figure S2c.** HSQC spectrum (600 MHz) of **2** in  $\text{CDCl}_3$

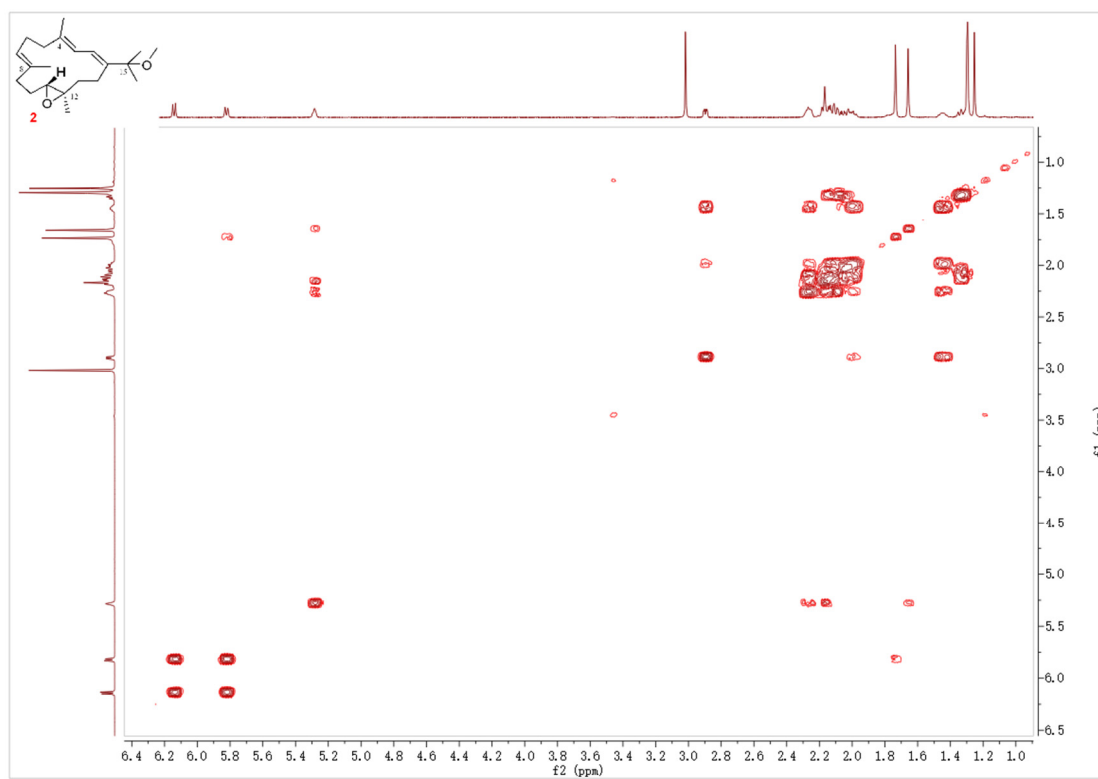

**Figure S2d.**  $^1\text{H}$ - $^1\text{H}$  COSY spectrum (600 MHz) of **2** in  $\text{CDCl}_3$

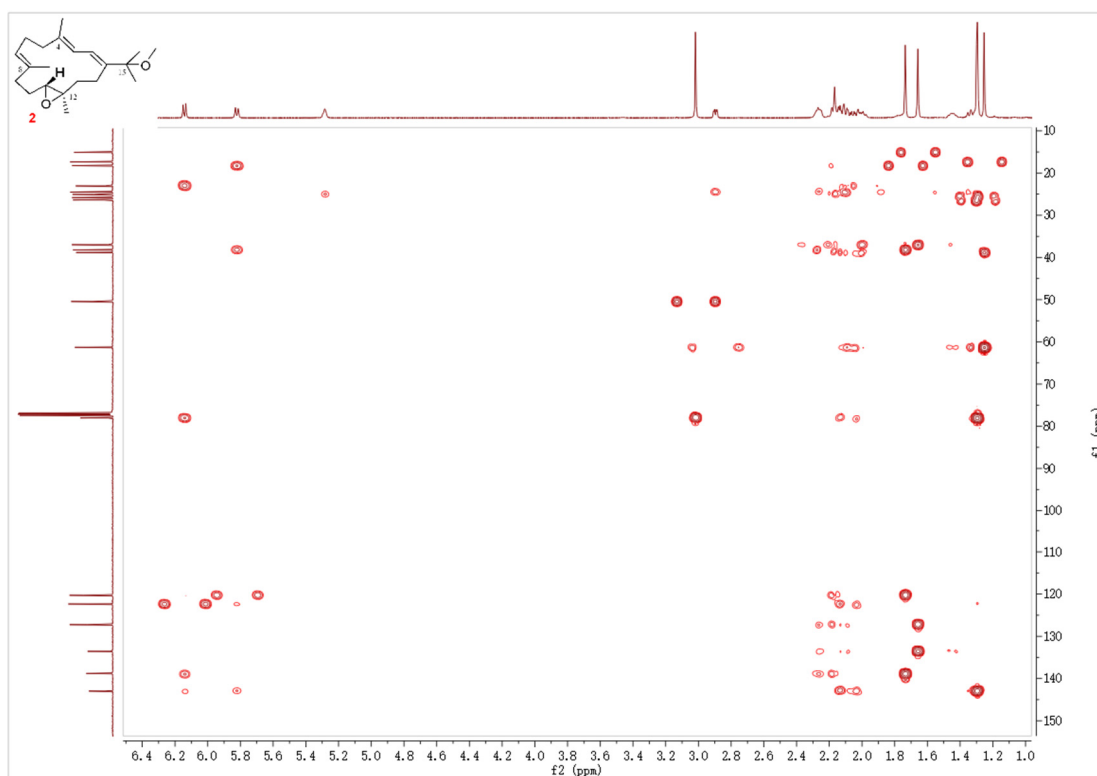

**Figure S2e.** HMBC spectrum (600 MHz) of **2** in  $\text{CDCl}_3$

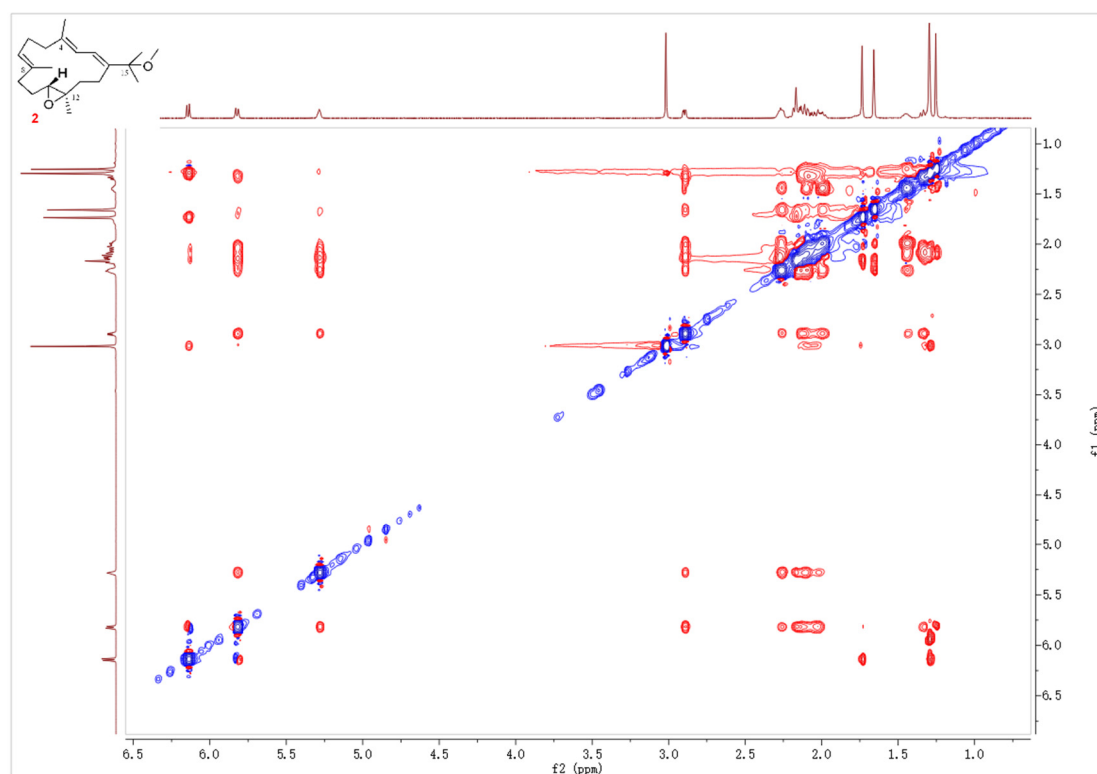

**Figure S2f.** NOESY spectrum (600 MHz) of **2** in  $\text{CDCl}_3$

EI202101481\_A8-11-214-c1#11 RT: 2.07

T: + c EI Full ms [ 49.50-800.50]

m/z= 48-803

| m/z      | Intensity | Relative | Theo.<br>Mass | Delta<br>(mmu) | RDB<br>equiv. | Composition                                    |
|----------|-----------|----------|---------------|----------------|---------------|------------------------------------------------|
| 255.2090 | 149446.0  | 0.24     | 255.2107      | -1.72          | 6.5           | C <sub>19</sub> H <sub>27</sub>                |
| 257.1903 | 301738.0  | 0.49     | 257.1900      | 0.32           | 6.5           | C <sub>18</sub> H <sub>25</sub> O <sub>1</sub> |
| 257.2262 | 272608.0  | 0.44     | 257.2264      | -0.17          | 5.5           | C <sub>19</sub> H <sub>29</sub>                |
| 258.1969 | 224007.0  | 0.36     | 258.1978      | -0.95          | 6.0           | C <sub>18</sub> H <sub>26</sub> O <sub>1</sub> |
| 258.2335 | 295367.0  | 0.48     | 258.2342      | -0.72          | 5.0           | C <sub>19</sub> H <sub>30</sub>                |
| 259.2037 | 107573.0  | 0.18     | 259.2056      | -1.95          | 5.5           | C <sub>18</sub> H <sub>27</sub> O <sub>1</sub> |
| 261.1861 | 47859.0   | 0.08     | 261.1849      | 1.15           | 5.5           | C <sub>17</sub> H <sub>25</sub> O <sub>2</sub> |
| 263.2010 | 76960.0   | 0.13     | 263.2006      | 0.43           | 4.5           | C <sub>17</sub> H <sub>27</sub> O <sub>2</sub> |
| 266.2027 | 28715.0   | 0.05     | 266.2029      | -0.19          | 8.0           | C <sub>20</sub> H <sub>26</sub>                |
| 267.2105 | 34198.0   | 0.06     | 267.2107      | -0.27          | 7.5           | C <sub>20</sub> H <sub>27</sub>                |
| 268.2183 | 846302.0  | 1.38     | 268.2186      | -0.29          | 7.0           | C <sub>20</sub> H <sub>28</sub>                |
| 269.1900 | 46052.0   | 0.08     | 269.1900      | -0.03          | 7.5           | C <sub>19</sub> H <sub>25</sub> O <sub>1</sub> |
| 269.2245 | 386019.0  | 0.63     | 269.2264      | -1.88          | 6.5           | C <sub>20</sub> H <sub>29</sub>                |
| 270.2333 | 173569.0  | 0.28     | 270.2342      | -0.87          | 6.0           | C <sub>20</sub> H <sub>30</sub>                |
| 271.2058 | 2512297.0 | 4.09     | 271.2056      | 0.17           | 6.5           | C <sub>19</sub> H <sub>27</sub> O <sub>1</sub> |
| 275.2003 | 119782.0  | 0.20     | 275.2006      | -0.30          | 5.5           | C <sub>18</sub> H <sub>27</sub> O <sub>2</sub> |
| 275.2384 | 41162.0   | 0.07     | 275.2369      | 1.42           | 4.5           | C <sub>19</sub> H <sub>31</sub> O <sub>1</sub> |
| 284.2128 | 86799.0   | 0.14     | 284.2135      | -0.69          | 7.0           | C <sub>20</sub> H <sub>28</sub> O <sub>1</sub> |
| 285.2211 | 281053.0  | 0.46     | 285.2213      | -0.22          | 6.5           | C <sub>20</sub> H <sub>29</sub> O <sub>1</sub> |
| 286.2285 | 5564416.0 | 9.06     | 286.2291      | -0.58          | 6.0           | C <sub>20</sub> H <sub>30</sub> O <sub>1</sub> |
| 287.1997 | 64010.0   | 0.10     | 287.2006      | -0.85          | 6.5           | C <sub>19</sub> H <sub>27</sub> O <sub>2</sub> |
| 289.2160 | 28182.0   | 0.05     | 289.2162      | -0.19          | 5.5           | C <sub>19</sub> H <sub>29</sub> O <sub>2</sub> |
| 290.2240 | 148913.0  | 0.24     | 290.2240      | -0.03          | 5.0           | C <sub>19</sub> H <sub>30</sub> O <sub>2</sub> |
| 300.2442 | 58261.0   | 0.09     | 300.2448      | -0.60          | 6.0           | C <sub>21</sub> H <sub>32</sub> O <sub>1</sub> |
| 302.2213 | 30523.0   | 0.05     | 302.2240      | -2.75          | 6.0           | C <sub>20</sub> H <sub>30</sub> O <sub>2</sub> |
| 303.2314 | 2217226.0 | 3.61     | 303.2319      | -0.43          | 5.5           | C <sub>20</sub> H <sub>31</sub> O <sub>2</sub> |
| 318.2558 | 224807.0  | 0.37     | 318.2553      | 0.45           | 5.0           | C <sub>21</sub> H <sub>34</sub> O <sub>2</sub> |

Figure S2g. HR-EIMS of 2

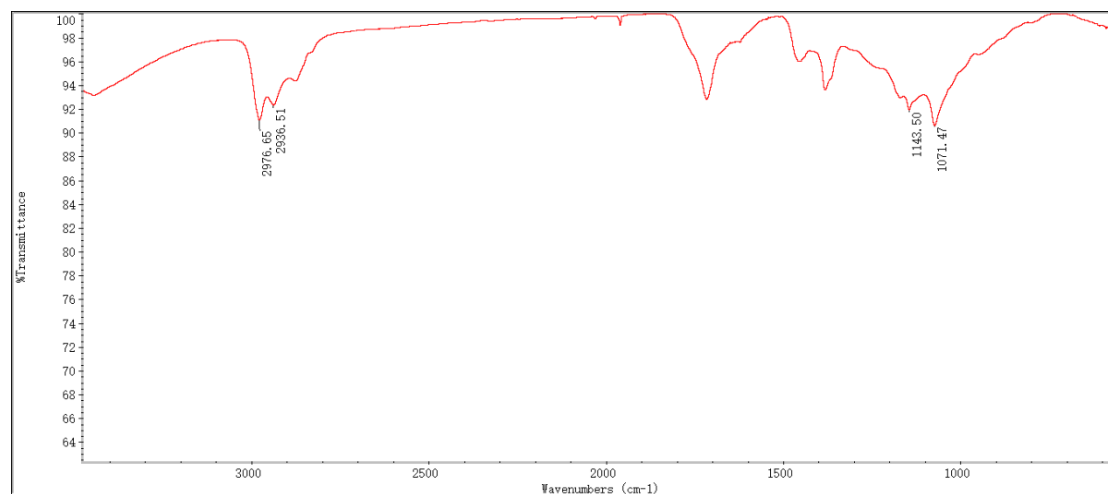

Figure S2h. IR spectrum of 2

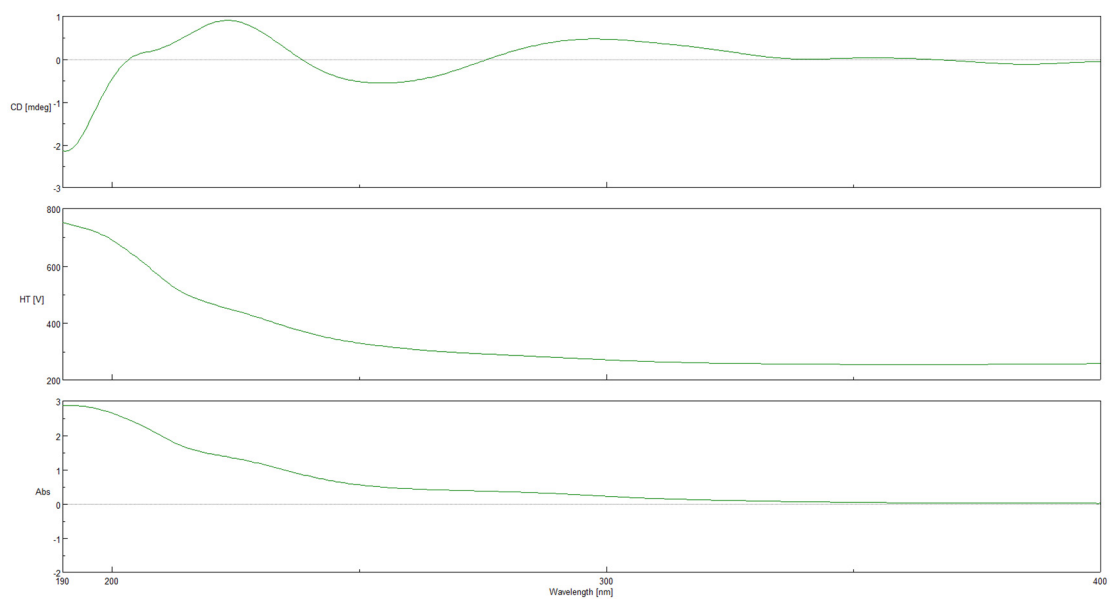

**Figure S2i.** ECD and UV spectra of **2**

### 3. Original spectra of 3

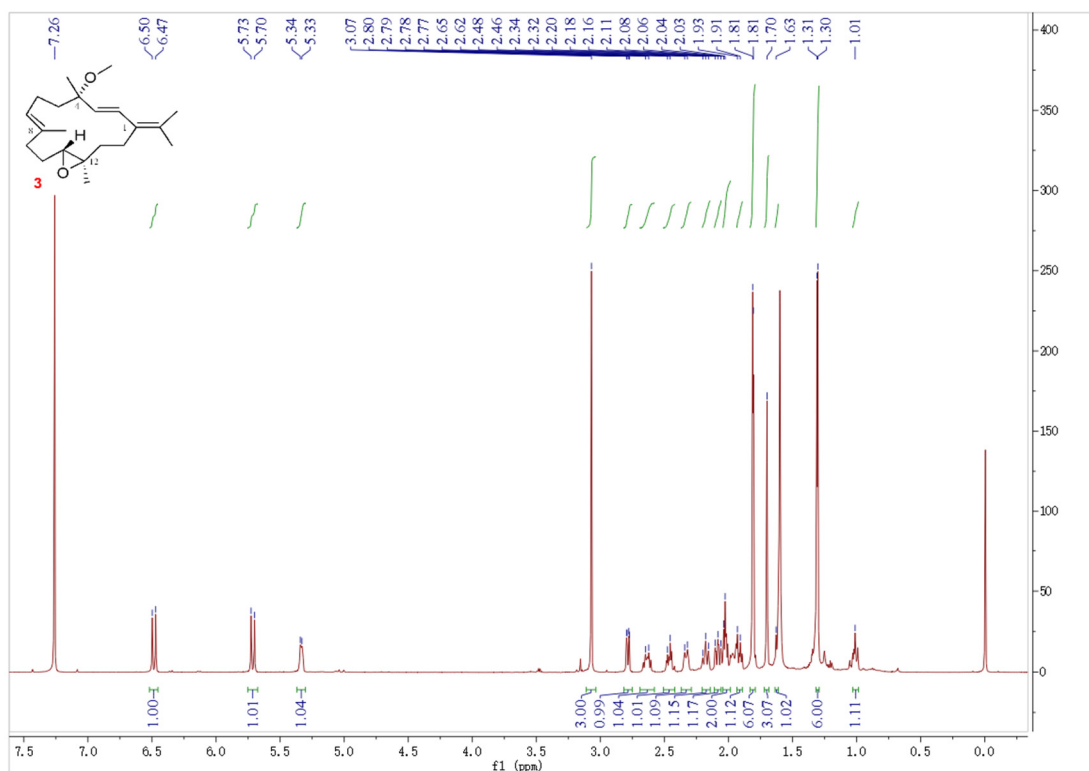

**Figure S3a.** <sup>1</sup>H NMR spectrum (600 MHz) of **3** in CDCl<sub>3</sub>

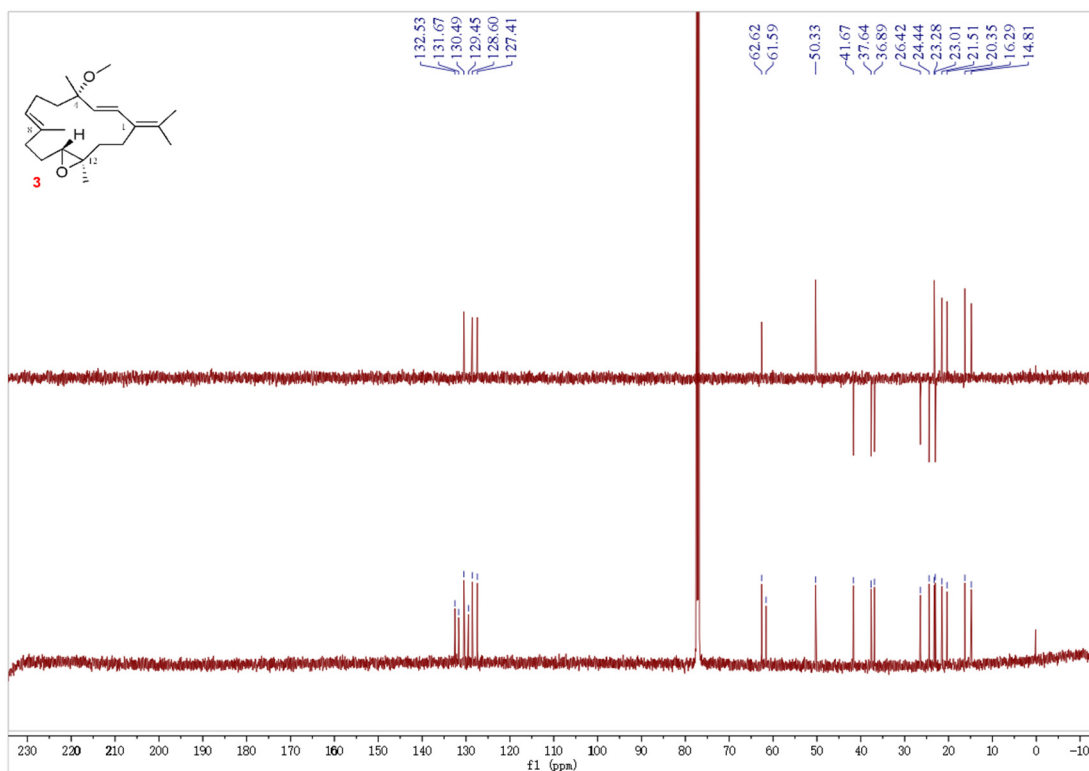

**Figure S3b.** DEPT135/<sup>13</sup>C NMR spectrum (150 MHz) of **3** in CDCl<sub>3</sub>

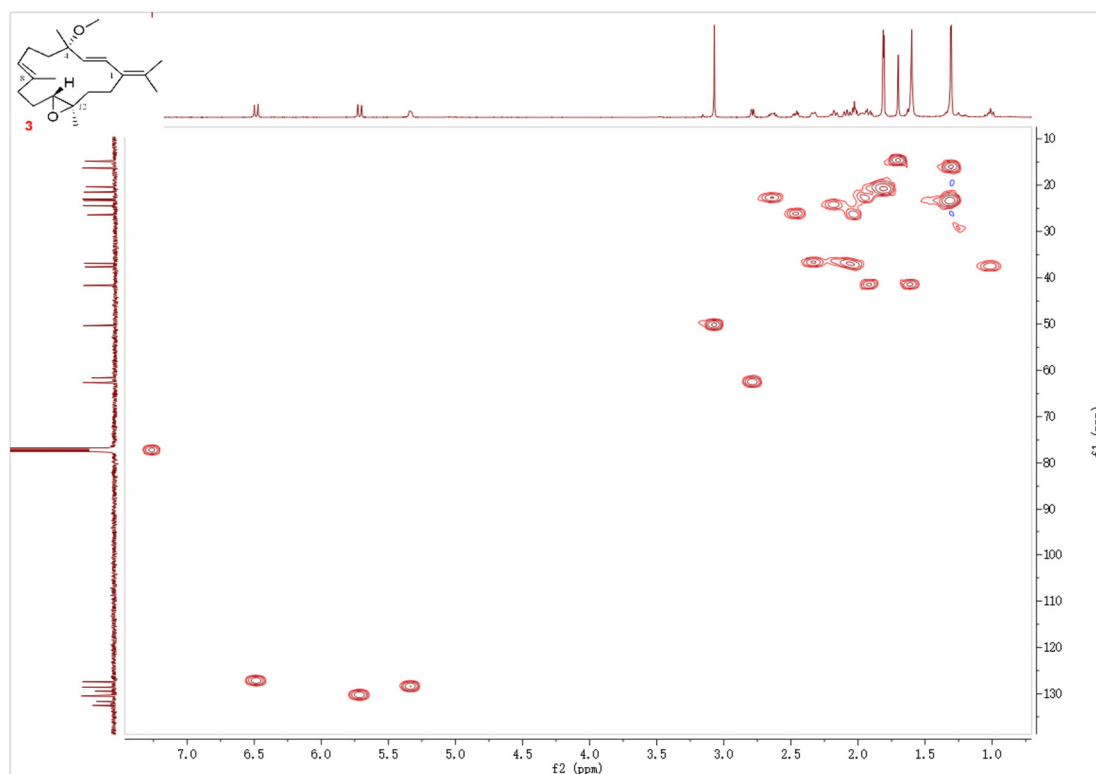

**Figure S3c.** HSQC spectrum (600 MHz) of **3** in CDCl<sub>3</sub>

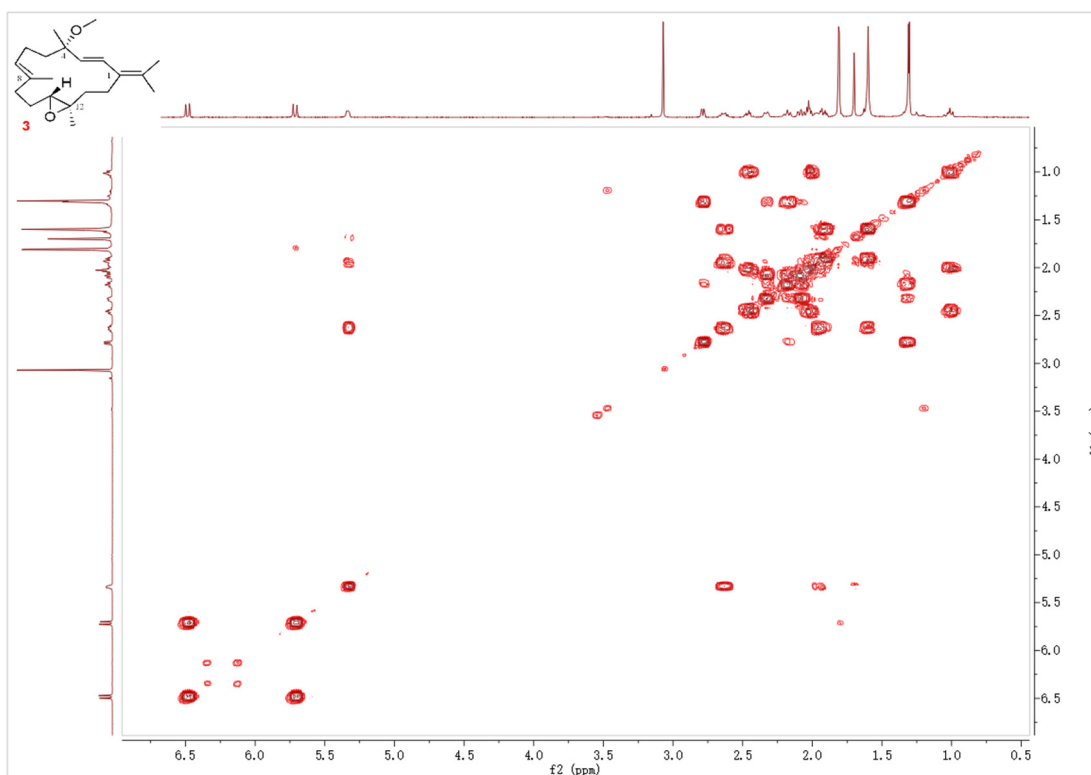

**Figure S3d.** <sup>1</sup>H-<sup>1</sup>H COSY spectrum (600 MHz) of **3** in CDCl<sub>3</sub>

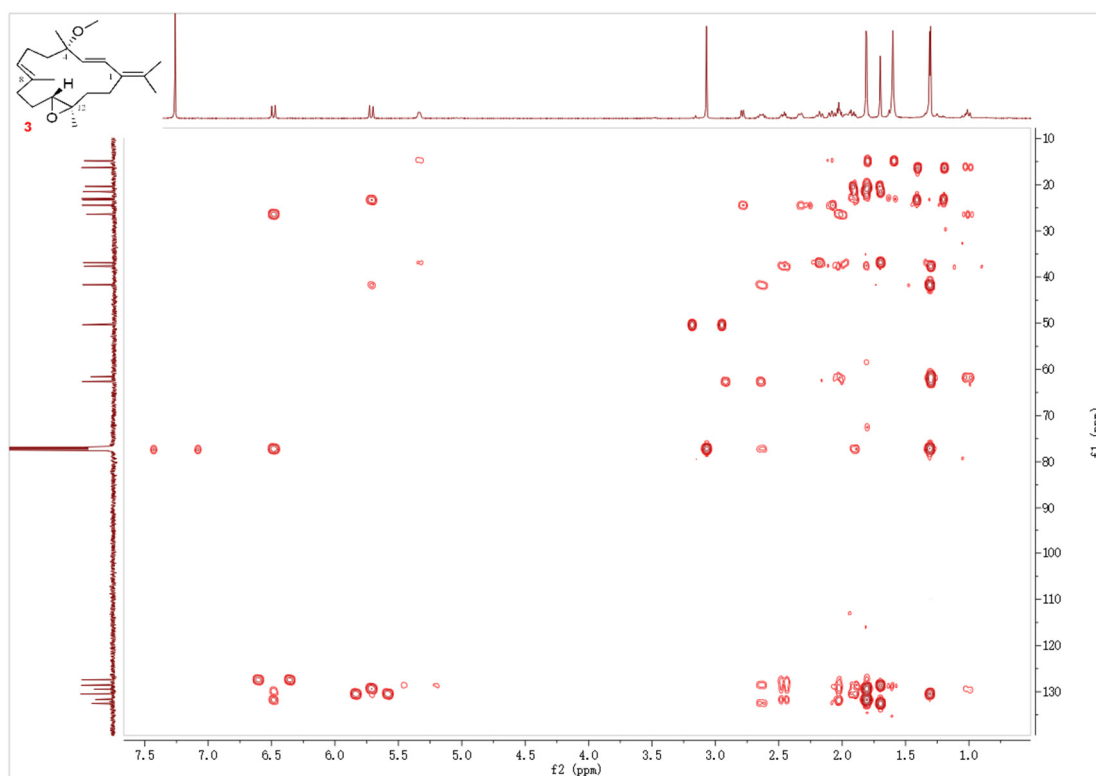

**Figure S3e.** HMBC spectrum (600 MHz) of **3** in  $\text{CDCl}_3$

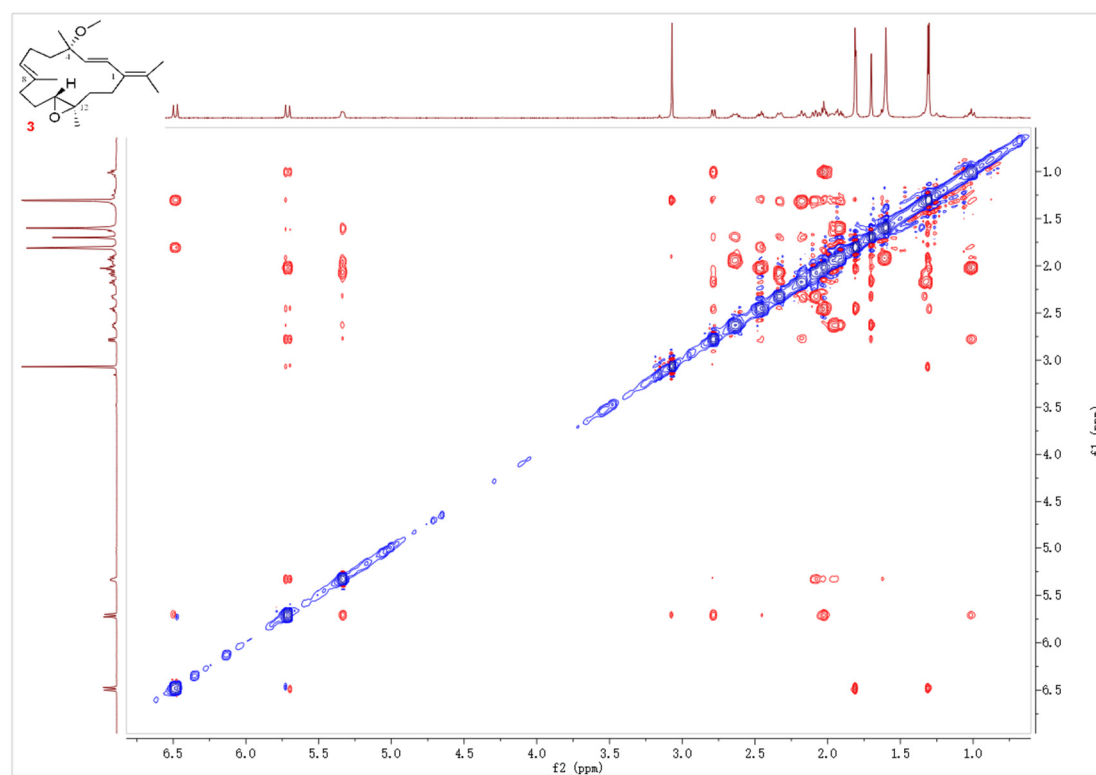

**Figure S3f.** NOESY spectrum (600 MHz) of **3** in  $\text{CDCl}_3$

EI202101494\_A8-11-215 -c1#7 RT: 1.24

T: + c EI Full ms [ 49.50-800.50]

m/z= 48-803

| m/z      | Intensity | Relative | Theo.<br>Mass | Delta<br>(mmu) | RDB<br>equiv. | Composition                                    |
|----------|-----------|----------|---------------|----------------|---------------|------------------------------------------------|
| 206.1692 | 299536.0  | 3.13     | 206.1665      | 2.68           | 4.0           | C <sub>14</sub> H <sub>22</sub> O <sub>1</sub> |
| 216.1891 | 239132.0  | 2.50     | 216.1873      | 1.84           | 5.0           | C <sub>16</sub> H <sub>24</sub>                |
| 218.1668 | 303319.0  | 3.17     | 218.1665      | 0.24           | 5.0           | C <sub>15</sub> H <sub>22</sub> O <sub>1</sub> |
| 219.1736 | 238083.0  | 2.49     | 219.1743      | -0.76          | 4.5           | C <sub>15</sub> H <sub>23</sub> O <sub>1</sub> |
| 221.1552 | 246921.0  | 2.58     | 221.1536      | 1.59           | 4.5           | C <sub>14</sub> H <sub>21</sub> O <sub>2</sub> |
| 225.1638 | 575387.0  | 6.01     | 225.1638      | 0.05           | 7.5           | C <sub>17</sub> H <sub>21</sub>                |
| 226.1700 | 261641.0  | 2.73     | 226.1716      | -1.63          | 7.0           | C <sub>17</sub> H <sub>22</sub>                |
| 227.1788 | 394432.0  | 4.12     | 227.1794      | -0.61          | 6.5           | C <sub>17</sub> H <sub>23</sub>                |
| 228.1864 | 545217.0  | 5.70     | 228.1873      | -0.85          | 6.0           | C <sub>17</sub> H <sub>24</sub>                |
| 229.1592 | 351419.0  | 3.67     | 229.1587      | 0.54           | 6.5           | C <sub>16</sub> H <sub>21</sub> O <sub>1</sub> |
| 229.1947 | 334569.0  | 3.50     | 229.1951      | -0.38          | 5.5           | C <sub>17</sub> H <sub>25</sub>                |
| 230.1653 | 176917.0  | 1.85     | 230.1665      | -1.22          | 6.0           | C <sub>16</sub> H <sub>22</sub> O <sub>1</sub> |
| 231.1743 | 485863.0  | 5.08     | 231.1743      | -0.08          | 5.5           | C <sub>16</sub> H <sub>23</sub> O <sub>1</sub> |
| 233.1903 | 141597.0  | 1.48     | 233.1900      | 0.34           | 4.5           | C <sub>16</sub> H <sub>25</sub> O <sub>1</sub> |
| 235.1691 | 652449.0  | 6.82     | 235.1693      | -0.18          | 4.5           | C <sub>15</sub> H <sub>23</sub> O <sub>2</sub> |
| 239.1790 | 171767.0  | 1.79     | 239.1794      | -0.39          | 7.5           | C <sub>18</sub> H <sub>23</sub>                |
| 240.1871 | 165504.0  | 1.73     | 240.1873      | -0.19          | 7.0           | C <sub>18</sub> H <sub>24</sub>                |
| 243.1748 | 790804.0  | 8.26     | 243.1743      | 0.49           | 6.5           | C <sub>17</sub> H <sub>23</sub> O <sub>1</sub> |
| 243.2110 | 395481.0  | 4.13     | 243.2107      | 0.30           | 5.5           | C <sub>18</sub> H <sub>27</sub>                |
| 244.1803 | 256967.0  | 2.68     | 244.1822      | -1.85          | 6.0           | C <sub>17</sub> H <sub>24</sub> O <sub>1</sub> |
| 245.1884 | 275120.0  | 2.87     | 245.1900      | -1.59          | 5.5           | C <sub>17</sub> H <sub>25</sub> O <sub>1</sub> |
| 253.1959 | 1050251.0 | 10.97    | 253.1951      | 0.81           | 7.5           | C <sub>19</sub> H <sub>25</sub>                |
| 257.1909 | 249846.0  | 2.61     | 257.1900      | 0.89           | 6.5           | C <sub>18</sub> H <sub>25</sub> O <sub>1</sub> |
| 268.2189 | 315463.0  | 3.30     | 268.2186      | 0.37           | 7.0           | C <sub>20</sub> H <sub>28</sub>                |
| 269.2262 | 161117.0  | 1.68     | 269.2264      | -0.14          | 6.5           | C <sub>20</sub> H <sub>29</sub>                |
| 271.2059 | 1014836.0 | 10.60    | 271.2056      | 0.28           | 6.5           | C <sub>19</sub> H <sub>27</sub> O <sub>1</sub> |
| 285.2215 | 244696.0  | 2.56     | 285.2213      | 0.20           | 6.5           | C <sub>20</sub> H <sub>29</sub> O <sub>1</sub> |
| 286.2292 | 1024691.0 | 10.70    | 286.2291      | 0.06           | 6.0           | C <sub>20</sub> H <sub>30</sub> O <sub>1</sub> |
| 287.2347 | 368363.0  | 3.85     | 287.2369      | -2.20          | 5.5           | C <sub>20</sub> H <sub>31</sub> O <sub>1</sub> |
| 303.2312 | 767119.0  | 8.01     | 303.2319      | -0.70          | 5.5           | C <sub>20</sub> H <sub>31</sub> O <sub>2</sub> |
| 318.2566 | 174565.0  | 1.82     | 318.2553      | 1.24           | 5.0           | C <sub>21</sub> H <sub>34</sub> O <sub>2</sub> |

Figure S3g. HR-EIMS of 3

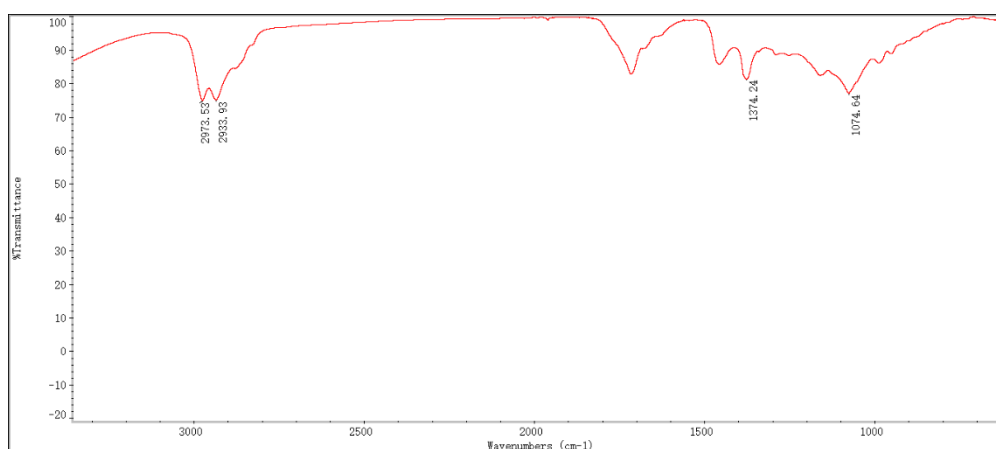

Figure S3h. IR spectrum of 3

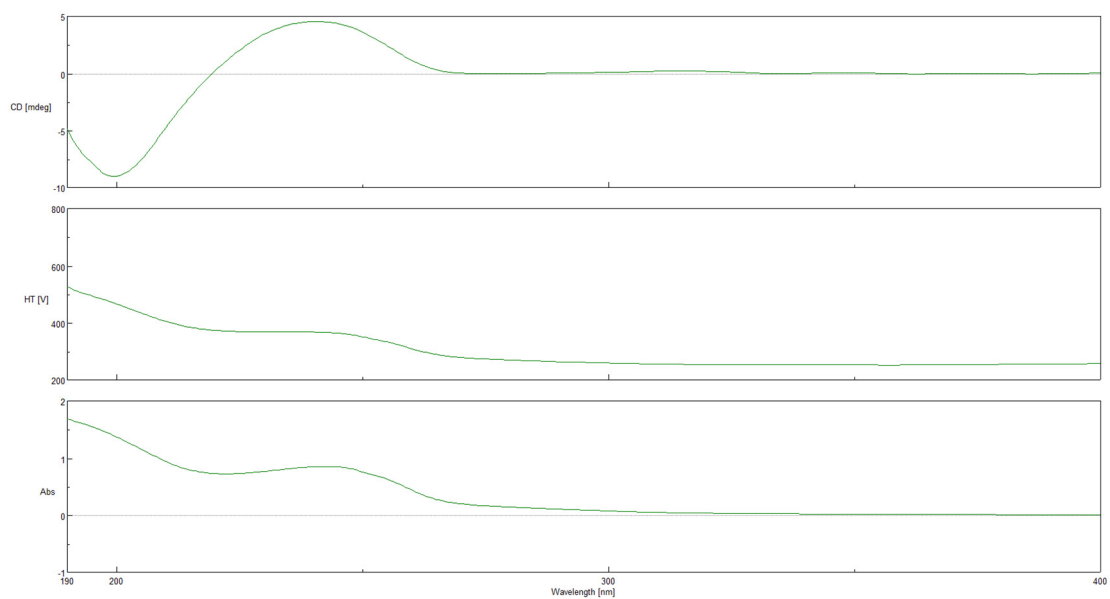

**Figure S3i.** ECD and UV spectra of **3**

#### 4. Original spectra of 4

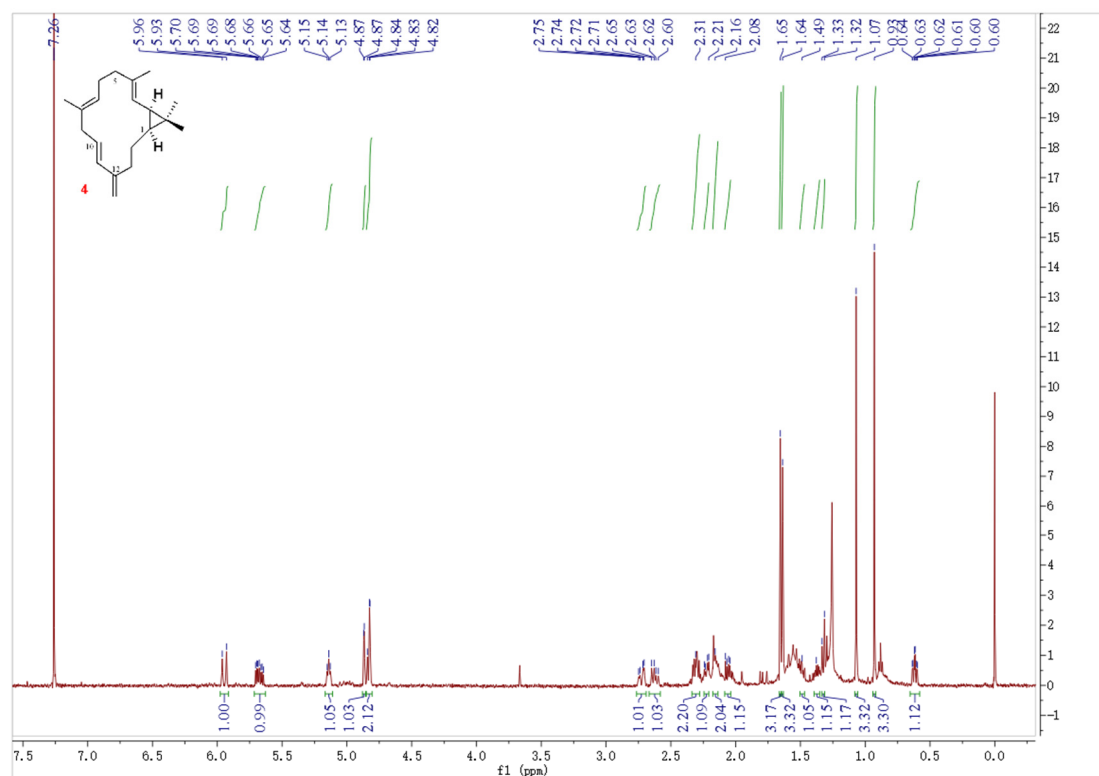

**Figure S4a.**  $^1\text{H}$  NMR spectrum (600 MHz) of **4** in  $\text{CDCl}_3$

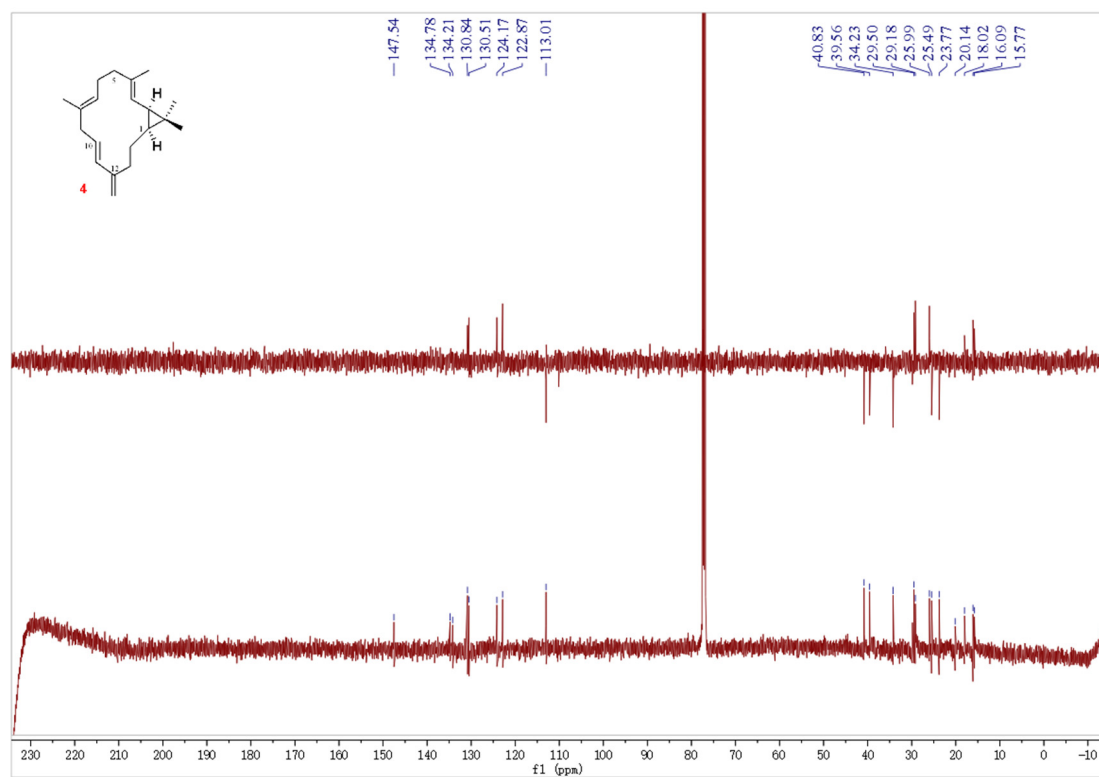

**Figure S4b.** DEPT135/<sup>13</sup>C NMR spectrum (150 MHz) of **4** in CDCl<sub>3</sub>

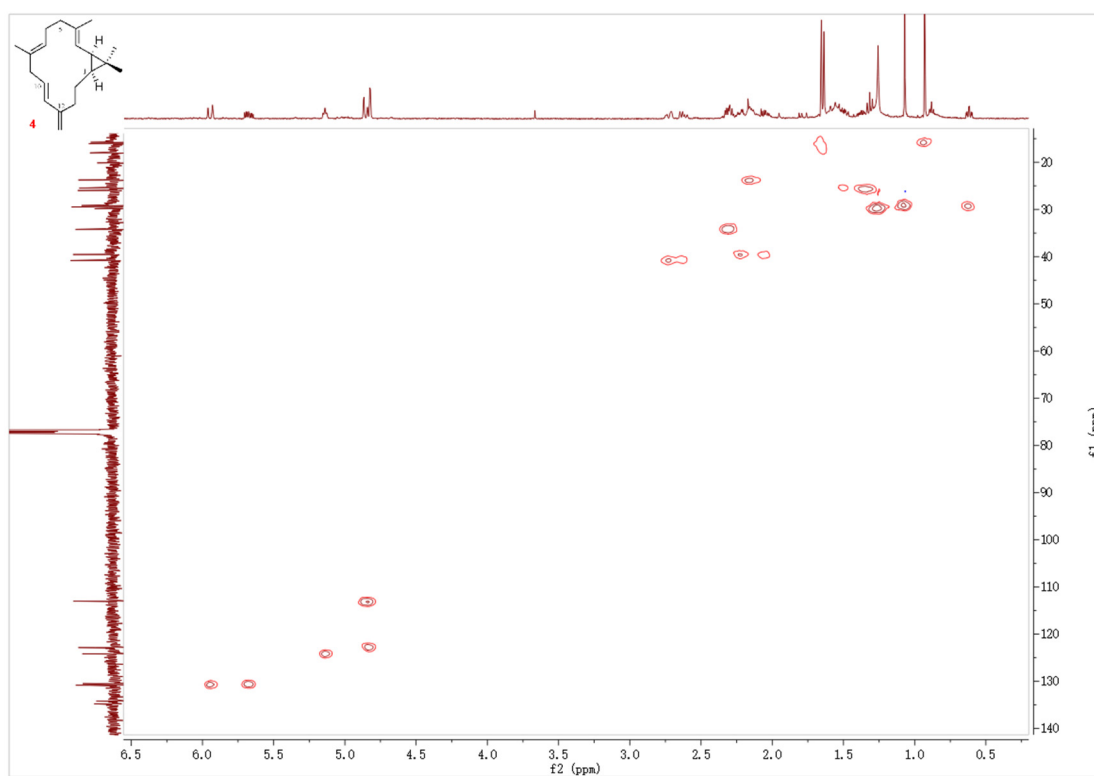

**Figure S4c.** HSQC spectrum (600 MHz) of **4** in CDCl<sub>3</sub>

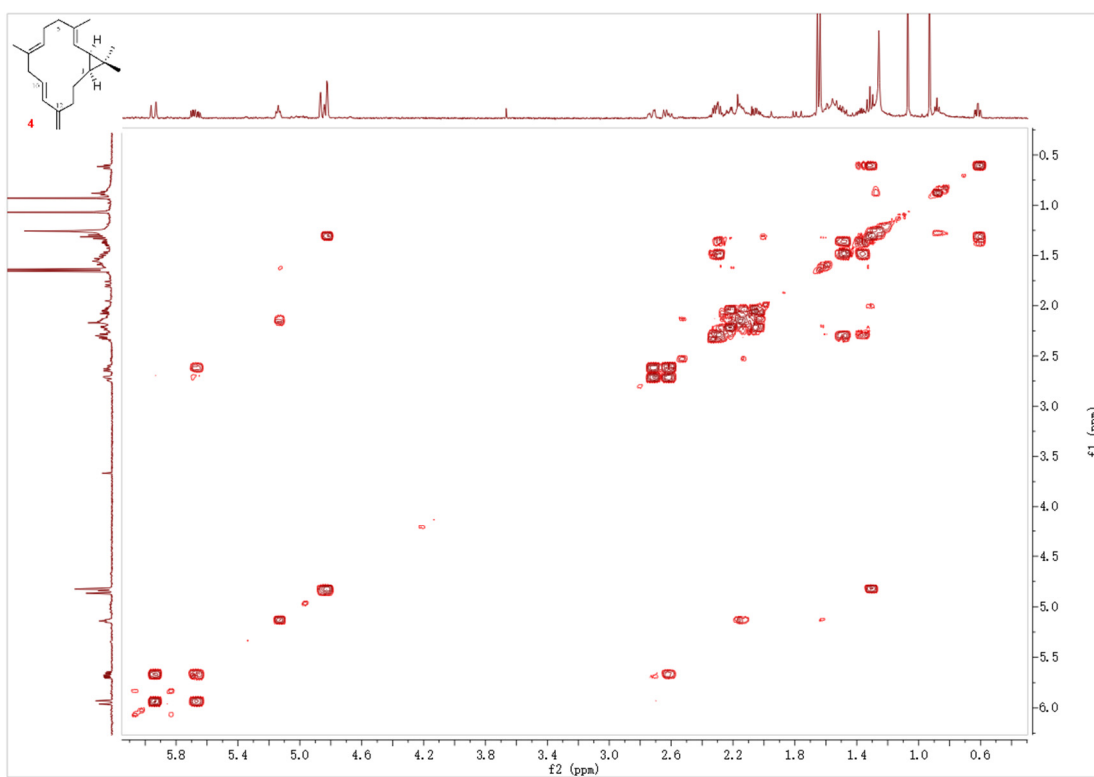

**Figure S4d.** <sup>1</sup>H-<sup>1</sup>H COSY spectrum (600 MHz) of **4** in CDCl<sub>3</sub>

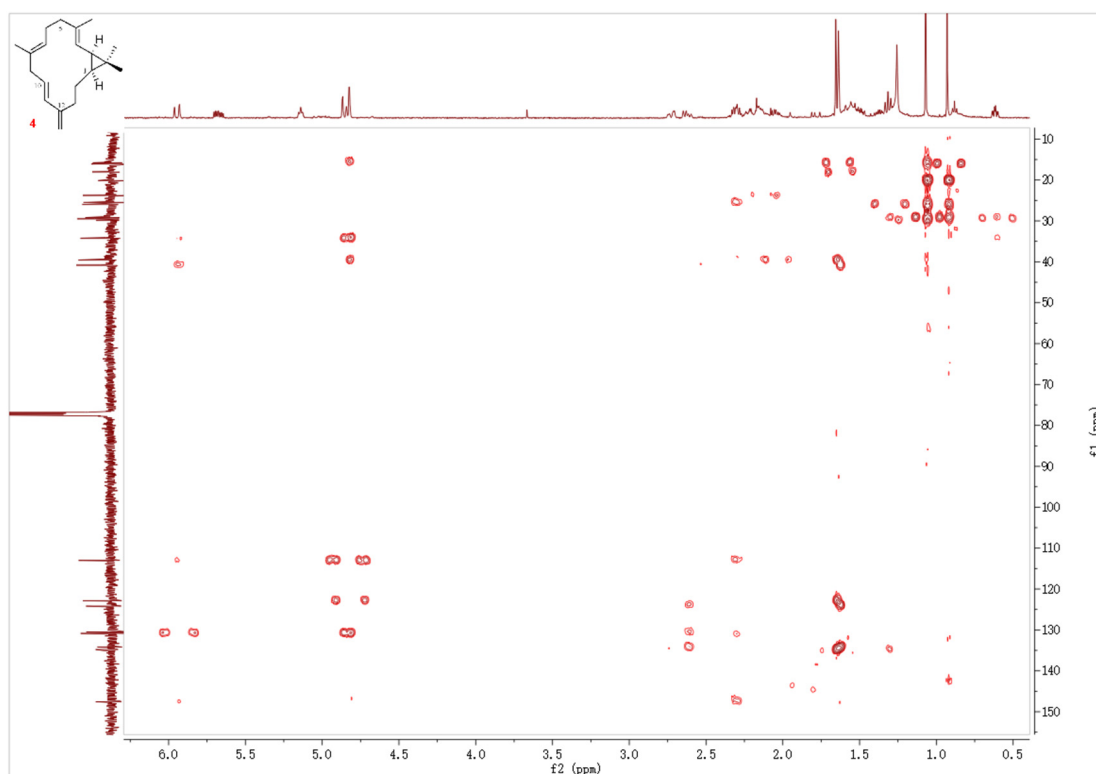

**Figure S4e.** HMBC spectrum (600 MHz) of **4** in  $\text{CDCl}_3$

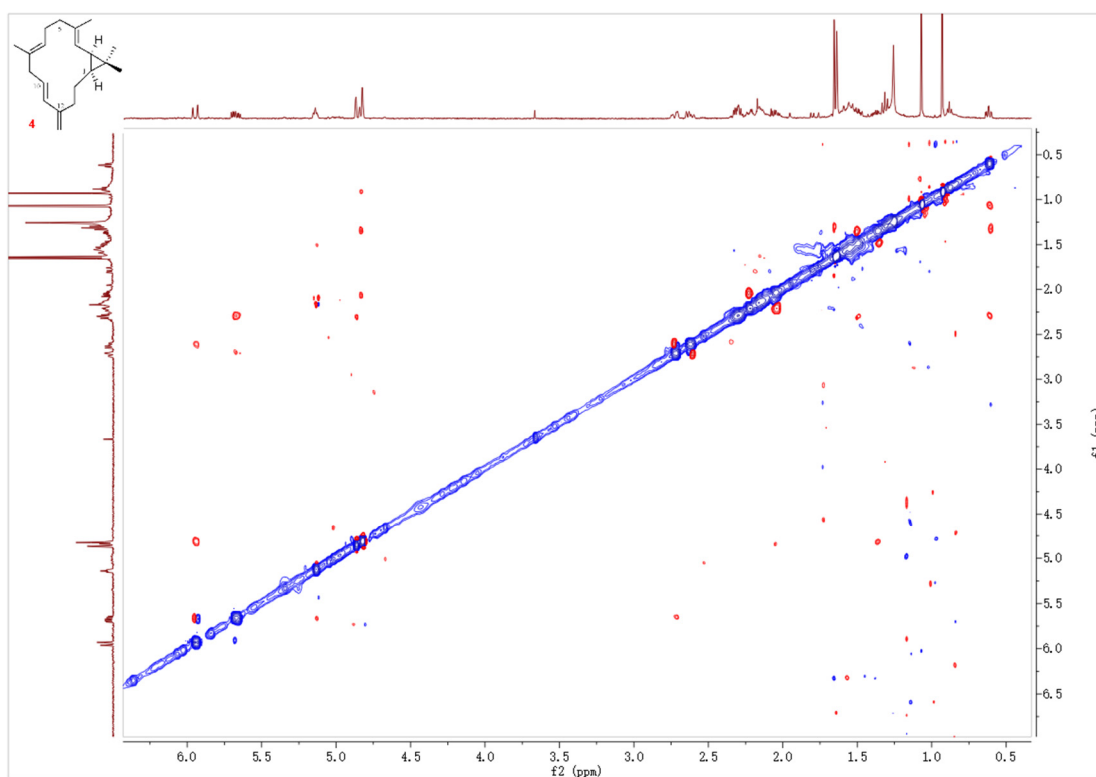

**Figure S4f.** NOESY spectrum (600 MHz) of **4** in  $\text{CDCl}_3$

EI202200083\_A8-1912-1-41 -c1#5 RT: 0.81

T: + c EI Full ms [ 49.50-800.50]

m/z= 48-803

| m/z      | Intensity | Relative | Theo. Mass | Delta (mmu) | RDB equiv. | Composition                     |
|----------|-----------|----------|------------|-------------|------------|---------------------------------|
| 131.0847 | 3164178.0 | 56.46    | 131.0855   | -0.81       | 5.5        | C <sub>10</sub> H <sub>11</sub> |
| 227.1798 | 1609077.0 | 28.71    | 227.1794   | 0.39        | 6.5        | C <sub>17</sub> H <sub>23</sub> |
| 228.1848 | 429153.0  | 7.66     | 228.1873   | -2.47       | 6.0        | C <sub>17</sub> H <sub>24</sub> |
| 255.2108 | 902465.0  | 16.10    | 255.2107   | 0.04        | 6.5        | C <sub>19</sub> H <sub>27</sub> |
| 270.2342 | 609755.0  | 10.88    | 270.2342   | -0.01       | 6.0        | C <sub>20</sub> H <sub>30</sub> |

**Figure S4g.** HR-EIMS of **4**

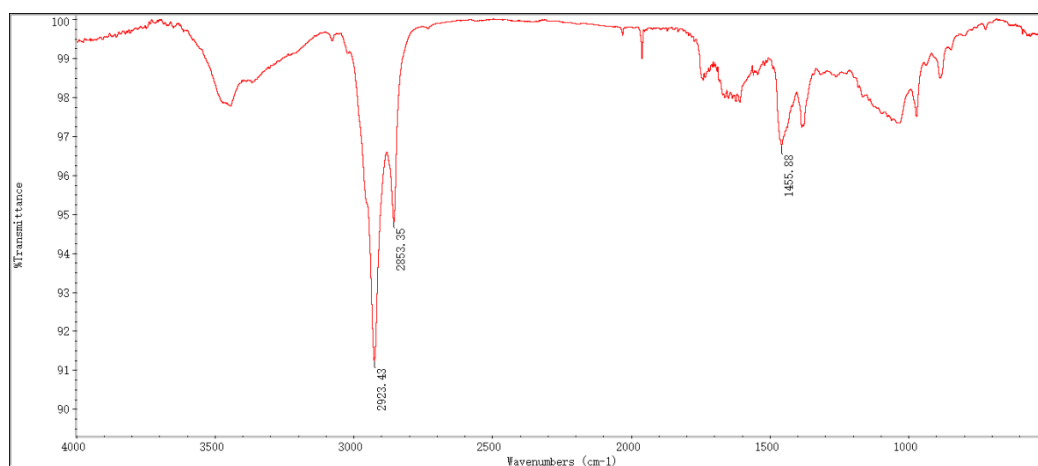

**Figure S4h.** IR spectrum of **4**

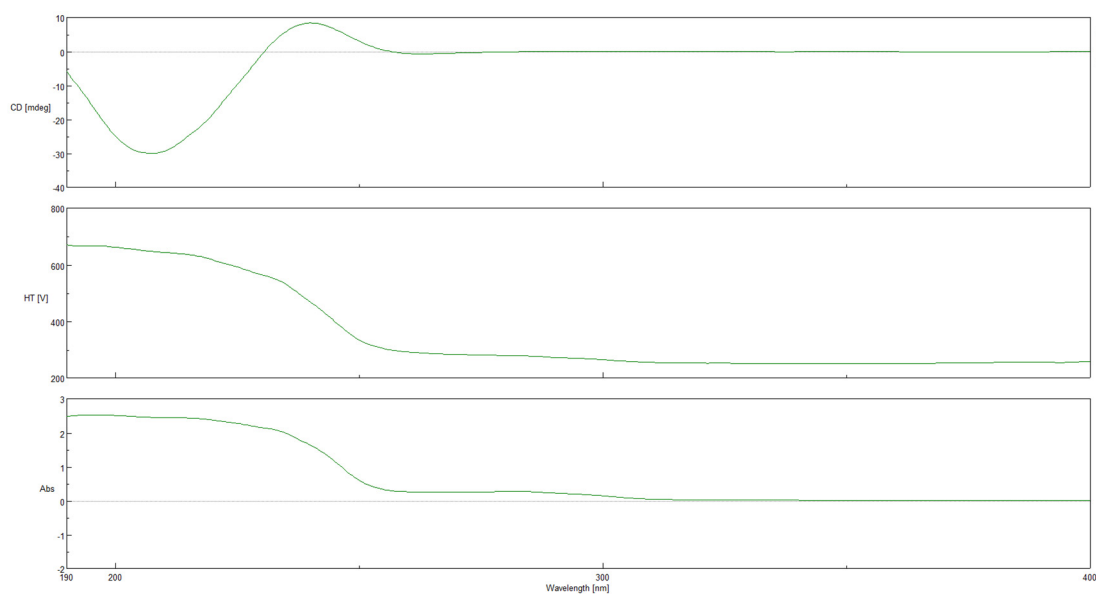

**Figure S4i.** ECD and UV spectra of **4**

## 5. QM-NMR calculation and DP4+ analysis of compound 3

Figure S5a. Structures of studied isomers for compound 3

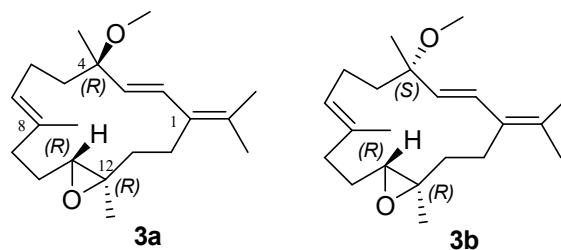

Figure S5b. DP4+ results obtained using experimental data of **3** versus isomers 1 (**3a**) and 2 (**3b**).

| Functional<br>mPW1PW91 |      | Solvent?<br>PCM      | Basis Set<br>6-31c(d) |            | Type of Data<br>Shielding Tensors |          |   |
|------------------------|------|----------------------|-----------------------|------------|-----------------------------------|----------|---|
|                        |      | DP4+<br>Experimental | 0.00%                 | 100.00%    | -                                 | -        | - |
| Nuclei                 | sp2? | Isomer 1             | Isomer 2              | Isomer 3   | Isomer 4                          | Isomer 5 |   |
| C                      |      | 26.4                 | 168.4                 | 168.8      |                                   |          |   |
| C                      |      | 61.6                 | 69.4                  | 67.8       |                                   |          |   |
| C                      |      | 36.9                 | 66.0                  | 64.8       |                                   |          |   |
| C                      | x    | 132.5                | 157.0                 | 156.8      |                                   |          |   |
| C                      | x    | 128.6                | 168.1                 | 167.2      |                                   |          |   |
| C                      | x    | 129.5                | 129.9                 | 131.6      |                                   |          |   |
| C                      | x    | 127.4                | 149.5                 | 149.4      |                                   |          |   |
| C                      | x    | 130.5                | 116.7                 | 116.7      |                                   |          |   |
| C                      |      | 77.3                 | 67.8                  | 63.9       |                                   |          |   |
| C                      |      | 41.7                 | 134.1                 | 134.0      |                                   |          |   |
| C                      |      | 23                   | 154.5                 | 154.3      |                                   |          |   |
| C                      |      | 24.4                 | 67.62                 | 69.03      |                                   |          |   |
| C                      |      | 62.6                 | 166.23                | 165.76     |                                   |          |   |
| C                      |      | 37.6                 | 65.16                 | 65.31      |                                   |          |   |
| C                      | x    | 131.7                | 64.00                 | 63.85      |                                   |          |   |
| C                      |      | 21.5                 | 171.69                | 171.62     |                                   |          |   |
| C                      |      | 20.4                 | 172.39                | 172.92     |                                   |          |   |
| C                      |      | 23.3                 | 169.51                | 169.58     |                                   |          |   |
| C                      |      | 14.8                 | 176.33                | 177.11     |                                   |          |   |
| C                      |      | 16.3                 | 175.41                | 175.92     |                                   |          |   |
| C                      |      | 50.3                 | 144.72                | 144.37     |                                   |          |   |
| H                      |      | 2.295                | 29.95                 | 29.85      |                                   |          |   |
| H                      |      | 5.34                 | 26.69                 | 26.66      |                                   |          |   |
| H                      |      | 2.215                | 30.02                 | 29.99      |                                   |          |   |
| H                      |      | 1.75                 | 30.48111              | 30.47238   |                                   |          |   |
| H                      |      | 2.79                 | 29.58054              | 29.48324   |                                   |          |   |
| H                      |      | 1.76                 | 30.30201              | 30.29185   |                                   |          |   |
| H                      |      | 5.71                 | 26.75766              | 26.3238    |                                   |          |   |
| H                      |      | 1.515                | 30.47556              | 30.48565   |                                   |          |   |
| H                      |      | 6.48                 | 25.42306              | 25.56866   |                                   |          |   |
| H                      |      | 2.25                 | 29.83487              | 29.82864   |                                   |          |   |
| H                      |      | 1.81                 | 30.43284              | 30.42748   |                                   |          |   |
| H                      |      | 1.81                 | 30.4112867            | 30.4589133 |                                   |          |   |
| H                      |      | 1.31                 | 30.96662              | 30.9350467 |                                   |          |   |
| H                      |      | 1.7                  | 30.62096              | 30.5196533 |                                   |          |   |
| H                      |      | 1.3                  | 30.9431533            | 30.91286   |                                   |          |   |
| H                      |      | 3.07                 | 28.9760133            | 28.9477067 |                                   |          |   |

|    | A                | B | C        | D        | E        |
|----|------------------|---|----------|----------|----------|
| 4  |                  |   | Isomer 1 | Isomer 2 | Isomer 3 |
| 5  | sDP4+ (H data)   |   | 0.06%    | 99.94%   | -        |
| 6  | sDP4+ (C data)   |   | 34.50%   | 65.50%   | -        |
| 7  | sDP4+ (all data) |   | 0.03%    | 99.97%   | -        |
| 8  | uDP4+ (H data)   |   | 0.17%    | 99.83%   | -        |
| 9  | uDP4+ (C data)   |   | 35.79%   | 64.21%   | -        |
| 10 | uDP4+ (all data) |   | 0.09%    | 99.91%   | -        |
| 11 | DP4+ (H data)    |   | 0.00%    | 100.00%  | -        |
| 12 | DP4+ (C data)    |   | 22.70%   | 77.30%   | -        |
| 13 | DP4+ (all data)  |   | 0.00%    | 100.00%  | -        |

## 6. TDDFT-EDC calculations of compounds 1-4

Torsional sampling (MCM) conformational searches using MMFFs force field were carried out by means of the conformational search module in the MacroModel applying an energy window of 21 kJ/mol, which afforded 145, 171, 125, 126 conformers for (12*S*)-**1**, (11*R*, 12*R*)-**2**, (4*S*, 11*R*, 12*R*)-**3**, (1*S*, 2*R*)-**4**, respectively. The Boltzmann populations of the conformers were obtained based on the potential energy provided by the MMFFs force field, which afforded 5, 5, 5, 4 conformers for re-optimization. The re-optimization and the following TDDFT calculations of the re-optimized geometries were all performed with Gaussian 09 at the B3LYP/6-311G(d,p) level with IEFPCM solvent model for acetonitrile. Frequency analysis was performed as well to confirm that the re-optimized geometries were at the energy minima. Finally, the SpecDis 1.62 software was used to obtain the Boltzmann-averaged ECD spectra and visualize the results.

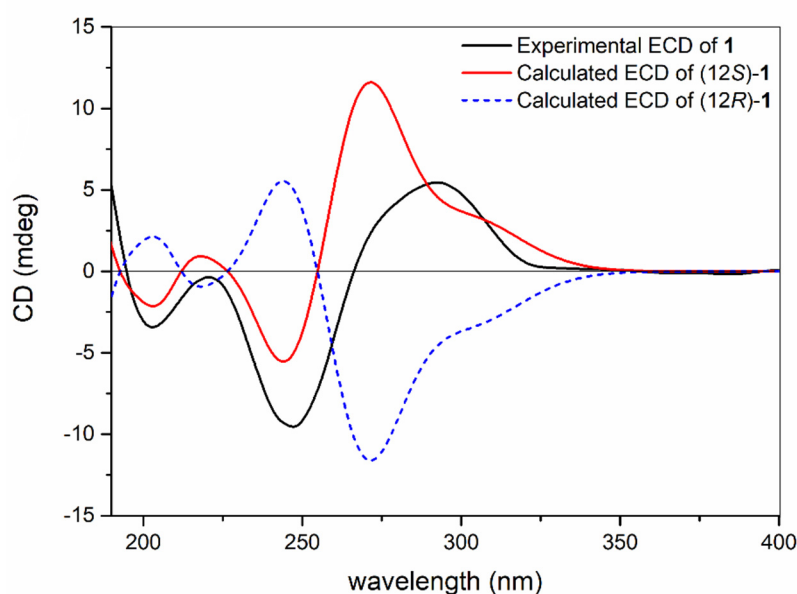

**Figure S6a.** Experimental ECD curve of **1**, and calculated ECD spectrum of (12*S*)-**1**

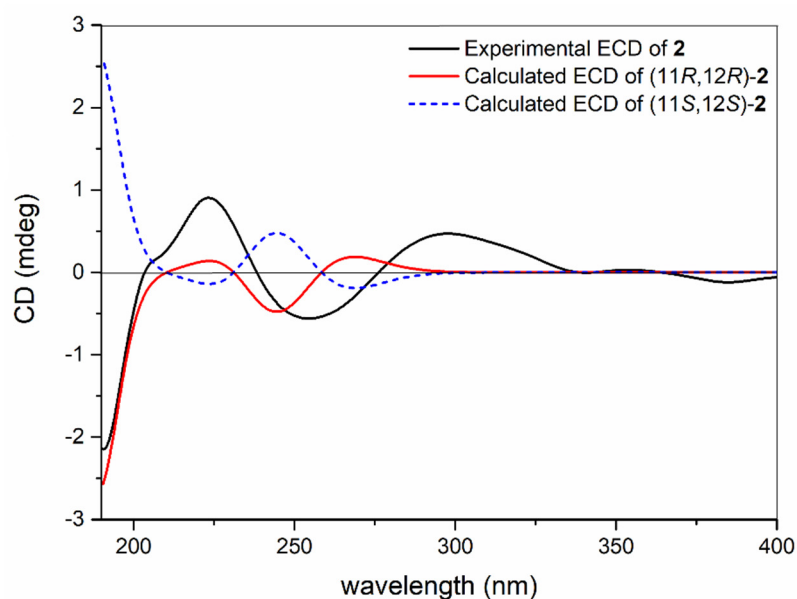

**Figure S6b.** Experimental ECD curve of **2**, and calculated ECD spectrum of (11*R*, 12*R*)-**2**

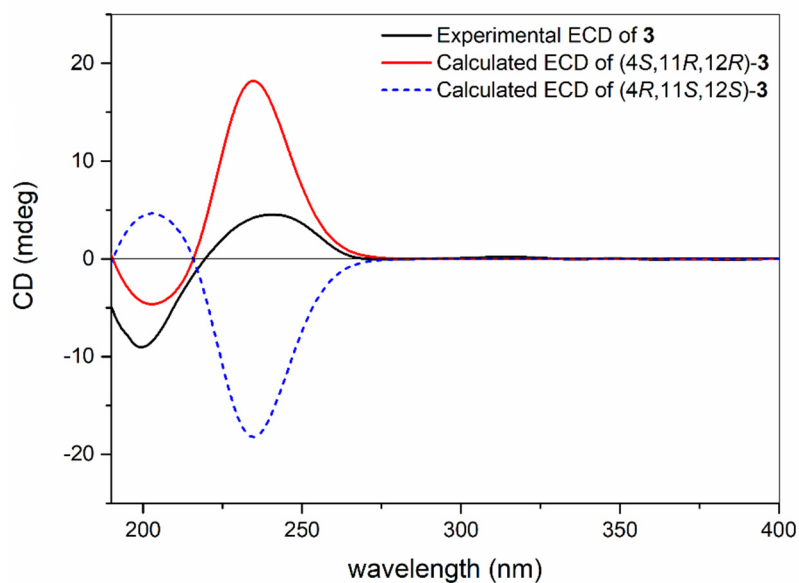

**Figure S6c.** Experimental ECD curve of **3**, and calculated ECD spectrum of (4*S*, 11*R*, 12*R*)-**3**

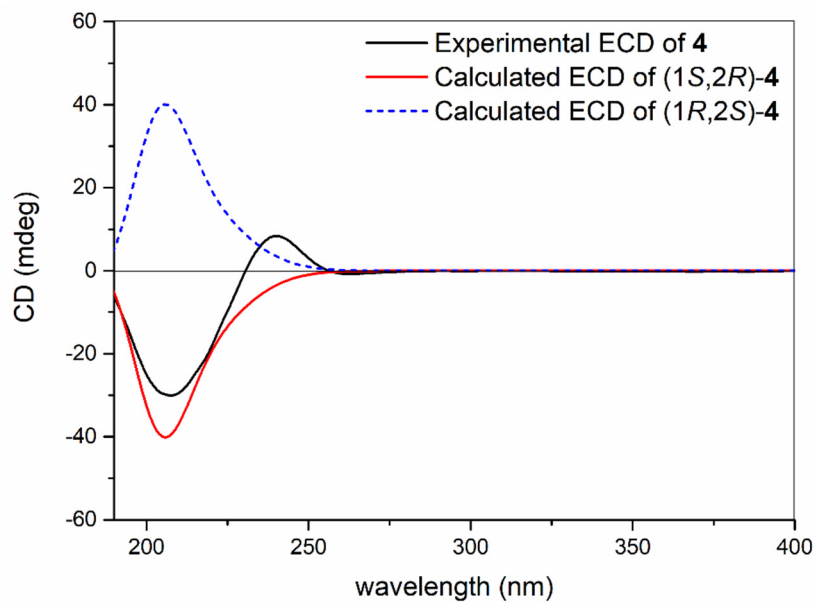

**Figure S6d.** Experimental ECD curve of **4**, and calculated ECD spectrum of (1*S*, 2*R*)-**4**

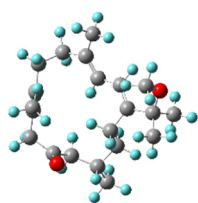

Conf. 1  
3.16%  
-971.22082194 a. u.

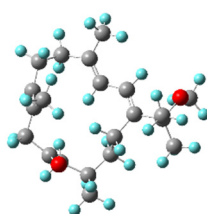

Conf. 2  
9.43%  
-971.22210426 a. u.

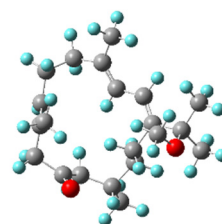

Conf. 3  
16.36%  
-971.22196749 a. u.

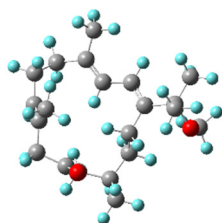

Conf. 4  
5.73%  
-971.22087028 a. u.

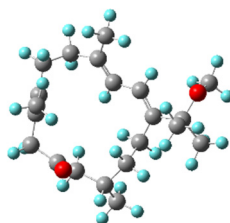

Conf. 5  
65.32%  
-971.22319110 a. u.

| Conf. 1 | Coordinates (Angstroms) |          |          |
|---------|-------------------------|----------|----------|
| atom    | X                       | Y        | Z        |
| C       | 2.93858                 | -2.73139 | -0.37242 |
| C       | 3.25353                 | -1.26776 | -0.22732 |
| C       | 3.14115                 | -0.4776  | 0.84943  |
| C       | 3.57909                 | 0.9813   | 0.76691  |
| C       | 2.38076                 | 1.93369  | 0.76491  |
| C       | 1.9124                  | 2.41783  | -0.59845 |
| C       | 1.8815                  | -3.02857 | -1.47663 |
| C       | 0.44522                 | -2.83282 | -1.02916 |
| C       | -0.08728                | -1.59638 | -0.9677  |
| C       | 0.53746                 | 3.11018  | -0.66008 |
| C       | -0.6164                 | 2.11737  | -0.91461 |
| C       | -1.44456                | -1.23358 | -0.56766 |
| C       | -0.80447                | 1.05656  | 0.188    |
| C       | -1.82645                | -0.02793 | -0.0984  |
| C       | -3.32664                | 0.24448  | 0.14523  |
| C       | -3.58568                | 1.30422  | 1.22865  |
| C       | -3.99279                | 0.68716  | -1.16861 |
| O       | -4.02832                | -0.9794  | 0.46707  |
| C       | -0.28146                | -4.08826 | -0.62352 |
| C       | 2.63491                 | -0.91462 | 2.20027  |
| C       | 0.53523                 | 4.20279  | -1.74009 |
| O       | 1.86503                 | 2.29552  | 1.80501  |
| C       | -3.76931                | -1.55618 | 1.74101  |
| H       | 3.86512                 | -3.24526 | -0.65875 |
| H       | 2.61891                 | -3.17631 | 0.5725   |
| H       | 3.65134                 | -0.81449 | -1.13526 |
| H       | 4.17466                 | 1.13923  | -0.13417 |
| H       | 4.18944                 | 1.23212  | 1.64034  |
| H       | 2.69785                 | 3.11945  | -0.91531 |
| H       | 1.9787                  | 1.58959  | -1.31344 |
| H       | 2.0145                  | -4.06267 | -1.8082  |
| H       | 2.09824                 | -2.39411 | -2.34217 |
| H       | 0.5649                  | -0.77814 | -1.25737 |
| H       | 0.37077                 | 3.58748  | 0.31183  |
| H       | -1.54122                | 2.69217  | -1.03118 |
| H       | -0.44509                | 1.61519  | -1.87539 |
| H       | -2.21447                | -1.99155 | -0.67038 |
| H       | 0.15154                 | 0.56662  | 0.37319  |

|   |          |          |          |
|---|----------|----------|----------|
| H | -1.05408 | 1.56689  | 1.12175  |
| H | -4.66074 | 1.36757  | 1.41372  |
| H | -3.08638 | 1.0717   | 2.17129  |
| H | -3.24208 | 2.28757  | 0.9024   |
| H | -5.05367 | 0.89056  | -0.99778 |
| H | -3.52393 | 1.58907  | -1.56597 |
| H | -3.90268 | -0.10587 | -1.91342 |
| H | 0.28083  | -4.61961 | 0.15379  |
| H | -1.2829  | -3.89821 | -0.23846 |
| H | -0.36192 | -4.77913 | -1.47108 |
| H | 1.87562  | -0.22095 | 2.5722   |
| H | 2.20696  | -1.91638 | 2.18631  |
| H | 3.45079  | -0.90264 | 2.9329   |
| H | -0.43122 | 4.71317  | -1.77921 |
| H | 1.30471  | 4.95517  | -1.54432 |
| H | 0.72766  | 3.77765  | -2.73114 |
| H | -4.25307 | -2.5342  | 1.73892  |
| H | -2.69728 | -1.69317 | 1.9203   |
| H | -4.19416 | -0.96043 | 2.55637  |

| Conf. 2 | Coordinates (Angstroms) |          |          |
|---------|-------------------------|----------|----------|
| atom    | X                       | Y        | Z        |
| C       | 2.9733                  | -2.70612 | -0.36256 |
| C       | 3.29655                 | -1.2395  | -0.28175 |
| C       | 3.22462                 | -0.4093  | 0.76798  |
| C       | 3.65123                 | 1.04698  | 0.61315  |
| C       | 2.4441                  | 1.98755  | 0.58686  |
| C       | 1.90068                 | 2.3344   | -0.79    |
| C       | 1.84028                 | -3.03053 | -1.38192 |
| C       | 0.43967                 | -2.85282 | -0.82787 |
| C       | -0.11571                | -1.62662 | -0.75513 |
| C       | 0.50347                 | 2.9805   | -0.85838 |
| C       | -0.62972                | 1.93583  | -0.94584 |
| C       | -1.43686                | -1.28379 | -0.23902 |
| C       | -0.80939                | 1.07204  | 0.31944  |
| C       | -1.80945                | -0.0659  | 0.20281  |
| C       | -3.23181                | 0.15494  | 0.74878  |
| C       | -3.21286                | 0.0131   | 2.28075  |

|   |          |          |          |
|---|----------|----------|----------|
| C | -3.8075  | 1.53181  | 0.36974  |
| O | -4.12526 | -0.89792 | 0.327    |
| C | -0.21926 | -4.11376 | -0.33234 |
| C | 2.77051  | -0.79453 | 2.15276  |
| C | 0.42187  | 3.94207  | -2.05422 |
| O | 1.97973  | 2.4442   | 1.61372  |
| C | -4.57754 | -0.87058 | -1.02238 |
| H | 3.87795  | -3.22881 | -0.6979  |
| H | 2.72069  | -3.12313 | 0.61485  |
| H | 3.65752  | -0.82088 | -1.22118 |
| H | 4.22735  | 1.16816  | -0.30633 |
| H | 4.27519  | 1.34252  | 1.46214  |
| H | 2.64986  | 3.02708  | -1.20087 |
| H | 1.9626   | 1.44861  | -1.43204 |
| H | 1.9636   | -4.06596 | -1.71326 |
| H | 1.98054  | -2.40157 | -2.26693 |
| H | 0.49093  | -0.80275 | -1.11737 |
| H | 0.36603  | 3.56221  | 0.05989  |
| H | -1.56627 | 2.45997  | -1.15779 |
| H | -0.44302 | 1.28629  | -1.80979 |
| H | -2.18197 | -2.07107 | -0.20666 |
| H | 0.15422  | 0.64236  | 0.59753  |
| H | -1.08567 | 1.72889  | 1.14945  |
| H | -4.20806 | 0.21359  | 2.68652  |
| H | -2.92059 | -1.0031  | 2.55228  |
| H | -2.5062  | 0.71102  | 2.73446  |
| H | -4.83651 | 1.60293  | 0.73163  |
| H | -3.23301 | 2.3352   | 0.83316  |
| H | -3.80812 | 1.69881  | -0.70839 |
| H | 0.41954  | -4.61183 | 0.40699  |
| H | -1.18977 | -3.93921 | 0.13121  |
| H | -0.35278 | -4.82774 | -1.15371 |
| H | 2.0174   | -0.09311 | 2.52358  |
| H | 2.35131  | -1.7992  | 2.19485  |
| H | 3.61126  | -0.74572 | 2.85501  |
| H | -0.55499 | 4.43163  | -2.09783 |
| H | 1.18614  | 4.72175  | -1.98804 |
| H | 0.56965  | 3.40862  | -2.99953 |
| H | -5.08602 | -1.82085 | -1.19264 |
| H | -5.29086 | -0.05851 | -1.19941 |
| H | -3.75082 | -0.78109 | -1.73493 |

| Conf. | Coordinates (Angstroms) |          |          |
|-------|-------------------------|----------|----------|
| 3     |                         |          |          |
| atom  | X                       | Y        | Z        |
| C     | 3.16654                 | -2.43402 | -0.2557  |
| C     | 3.34404                 | -0.95519 | -0.04902 |
| C     | 3.05602                 | -0.20425 | 1.02276  |
| C     | 3.35611                 | 1.29114  | 1.00201  |
| C     | 2.07962                 | 2.11247  | 0.80254  |
| C     | 1.72752                 | 2.45336  | -0.63633 |
| C     | 2.22153                 | -2.77759 | -1.44618 |
| C     | 0.74857                 | -2.76599 | -1.08611 |
| C     | 0.06811                 | -1.60322 | -1.02918 |
| C     | 0.30441                 | 2.97341  | -0.9159  |
| C     | -0.70134                | 1.83657  | -1.19686 |
| C     | -1.33784                | -1.42168 | -0.67965 |
| C     | -1.03617                | 0.95897  | 0.02831  |
| C     | -1.88915                | -0.27067 | -0.24156 |
| C     | -3.38149                | -0.15829 | 0.10455  |
| C     | -4.05213                | 0.95376  | -0.71656 |
| C     | -4.17702                | -1.45761 | -0.08374 |
| O     | -3.52424                | 0.31299  | 1.47369  |
| C     | 0.16146                 | -4.1138  | -0.75732 |
| C     | 2.45358                 | -0.71245 | 2.30759  |
| C     | 0.32502                 | 3.95873  | -2.09525 |

|   |          |          |          |
|---|----------|----------|----------|
| O | 1.41677  | 2.48506  | 1.75128  |
| C | -3.03095 | -0.53928 | 2.49875  |
| H | 4.15153  | -2.86059 | -0.48293 |
| H | 2.81453  | -2.93457 | 0.64891  |
| H | 3.78987  | -0.44678 | -0.90386 |
| H | 4.06285  | 1.51628  | 0.20065  |
| H | 3.79506  | 1.59671  | 1.95626  |
| H | 2.46415  | 3.22269  | -0.91103 |
| H | 1.97122  | 1.59749  | -1.27547 |
| H | 2.48838  | -3.77031 | -1.8207  |
| H | 2.41863  | -2.07346 | -2.2607  |
| H | 0.63188  | -0.70432 | -1.25454 |
| H | -0.02796 | 3.51427  | -0.0229  |
| H | -1.62408 | 2.28181  | -1.5798  |
| H | -0.30912 | 1.21276  | -2.00908 |
| H | -1.97325 | -2.29309 | -0.78542 |
| H | -0.1062  | 0.62627  | 0.49248  |
| H | -1.53816 | 1.57846  | 0.77529  |
| H | -5.1061  | 1.02758  | -0.437   |
| H | -3.58362 | 1.91923  | -0.52275 |
| H | -3.98643 | 0.73879  | -1.78521 |
| H | -5.20001 | -1.29532 | 0.26342  |
| H | -4.21674 | -1.74155 | -1.13742 |
| H | -3.75681 | -2.29485 | 0.47521  |
| H | 0.7559   | -4.60694 | 0.02096  |
| H | -0.8689  | -4.06473 | -0.40649 |
| H | 0.19592  | -4.77256 | -1.63315 |
| H | 1.58814  | -0.10826 | 2.59587  |
| H | 2.13758  | -1.75311 | 2.24349  |
| H | 3.17805  | -0.62592 | 3.12607  |
| H | -0.67298 | 4.36328  | -2.28554 |
| H | 0.99653  | 4.79944  | -1.89796 |
| H | 0.66586  | 3.4676   | -3.01332 |
| H | -3.62385 | -1.45583 | 2.59746  |
| H | -1.98265 | -0.81539 | 2.33693  |
| H | -3.10785 | 0.02436  | 3.42963  |

| Conf. | Coordinates (Angstroms) |          |          |
|-------|-------------------------|----------|----------|
| 4     |                         |          |          |
| atom  | X                       | Y        | Z        |
| C     | 3.47477                 | -2.11049 | -0.46038 |
| C     | 3.49018                 | -0.61412 | -0.31235 |
| C     | 3.26941                 | 0.13486  | 0.77671  |
| C     | 3.36873                 | 1.65422  | 0.68399  |
| C     | 1.98235                 | 2.30398  | 0.67569  |
| C     | 1.38012                 | 2.56673  | -0.69507 |
| C     | 2.42439                 | -2.61109 | -1.49643 |
| C     | 1.02389                 | -2.75527 | -0.93364 |
| C     | 0.21751                 | -1.68099 | -0.82063 |
| C     | -0.11874                | 2.91784  | -0.75531 |
| C     | -1.02284                | 1.67284  | -0.87844 |
| C     | -1.14637                | -1.65426 | -0.29753 |
| C     | -1.0272                 | 0.75375  | 0.35925  |
| C     | -1.7667                 | -0.56763 | 0.20775  |
| C     | -3.2007                 | -0.63171 | 0.75498  |
| C     | -3.93984                | -1.9392  | 0.43362  |
| C     | -3.20716                | -0.43442 | 2.2806   |
| O     | -3.95172                | 0.50955  | 0.25928  |
| C     | 0.65761                 | -4.1443  | -0.47979 |
| C     | 2.93401                 | -0.39619 | 2.14677  |
| C     | -0.39116                | 3.87626  | -1.92532 |
| O     | 1.4257                  | 2.61002  | 1.71248  |
| C     | -4.35431                | 0.45809  | -1.10373 |
| H     | 4.46448                 | -2.42263 | -0.81667 |
| H     | 3.31753                 | -2.61418 | 0.49593  |
| H     | 3.73485                 | -0.08725 | -1.23462 |

|       |                         |          |          |   |          |          |          |
|-------|-------------------------|----------|----------|---|----------|----------|----------|
| H     | 3.90943                 | 1.93623  | -0.22187 | C | -1.34764 | 1.10683  | -0.81473 |
| H     | 3.90694                 | 2.04611  | 1.55214  | C | -1.98149 | -0.10555 | -0.16211 |
| H     | 1.97371                 | 3.40571  | -1.08695 | C | -3.33779 | 0.05266  | 0.56438  |
| H     | 1.62135                 | 1.72676  | -1.3562  | C | -3.11301 | 0.33616  | 2.05924  |
| H     | 2.75525                 | -3.58097 | -1.87988 | C | -4.21702 | 1.15955  | -0.04123 |
| H     | 2.4219                  | -1.92325 | -2.34796 | O | -4.06193 | -1.20073 | 0.58185  |
| H     | 0.62803                 | -0.73243 | -1.15069 | C | 0.24228  | -3.86746 | 0.4673   |
| H     | -0.37051                | 3.43609  | 0.17678  | C | 3.48177  | -0.60469 | 1.87464  |
| H     | -2.04571                | 2.00959  | -1.06351 | C | -0.27523 | 3.88038  | -1.60958 |
| H     | -0.71876                | 1.10487  | -1.76656 | O | 2.236    | 2.40058  | 1.56643  |
| H     | -1.68562                | -2.59401 | -0.32421 | C | -4.59188 | -1.66045 | -0.65558 |
| H     | 0.00259                 | 0.52933  | 0.64234  | H | 4.02689  | -3.06946 | -1.05919 |
| H     | -1.45036                | 1.32104  | 1.19049  | H | 3.1674   | -2.97013 | 0.46417  |
| H     | -4.98062                | -1.84457 | 0.75229  | H | 3.44099  | -0.6956  | -1.6128  |
| H     | -3.92514                | -2.18027 | -0.63029 | H | 4.03952  | 1.37158  | -0.92239 |
| H     | -3.49861                | -2.77708 | 0.97647  | H | 4.55628  | 1.61742  | 0.7593   |
| H     | -4.23542                | -0.47362 | 2.64838  | H | 2.24881  | 3.13881  | -1.36021 |
| H     | -2.62792                | -1.21985 | 2.77079  | H | 1.51351  | 1.56697  | -1.39735 |
| H     | -2.78659                | 0.53265  | 2.55785  | H | 1.97831  | -4.12247 | -1.50803 |
| H     | 1.40578                 | -4.52148 | 0.22752  | H | 1.84794  | -2.54492 | -2.27202 |
| H     | -0.31566                | -4.19799 | 0.00716  | H | 0.28437  | -0.99738 | -1.49778 |
| H     | 0.65826                 | -4.83965 | -1.3275  | H | 0.50459  | 3.83358  | 0.38272  |
| H     | 2.05682                 | 0.11424  | 2.55496  | H | -0.22503 | 1.55076  | 0.98921  |
| H     | 2.73829                 | -1.46785 | 2.14793  | H | -1.51868 | 2.68427  | 0.66999  |
| H     | 3.7588                  | -0.19929 | 2.84195  | H | -1.89878 | -2.09494 | 0.40839  |
| H     | -1.44755                | 4.15615  | -1.96428 | H | -2.08367 | 1.6306   | -1.43012 |
| H     | 0.19662                 | 4.79409  | -1.83172 | H | -0.57279 | 0.7691   | -1.50466 |
| H     | -0.13444                | 3.4114   | -2.88354 | H | -4.07708 | 0.44231  | 2.56432  |
| H     | -4.70644                | 1.45836  | -1.36062 | H | -2.56815 | -0.49303 | 2.51464  |
| H     | -3.52614                | 0.19422  | -1.77119 | H | -2.53776 | 1.25054  | 2.20838  |
| H     | -5.17466                | -0.25051 | -1.26326 | H | -5.19782 | 1.13694  | 0.43999  |
| <hr/> |                         |          |          | H | -3.78025 | 2.14437  | 0.13168  |
| Conf. | Coordinates (Angstroms) |          |          | H | -4.35782 | 1.04046  | -1.1172  |
| 5     | <hr/>                   |          |          | H | 1.07748  | -4.05223 | 1.15257  |
| atom  | X                       | Y        | Z        | H | -0.62875 | -3.61351 | 1.07022  |
| C     | 3.17426                 | -2.59145 | -0.55996 | H | 0.04343  | -4.82012 | -0.03828 |
| C     | 3.37979                 | -1.10309 | -0.60385 | H | 4.468    | -0.44714 | 2.32761  |
| C     | 3.51721                 | -0.24099 | 0.41252  | H | 2.78616  | 0.0425   | 2.41564  |
| C     | 3.75128                 | 1.23755  | 0.12176  | H | 3.19307  | -1.64102 | 2.04652  |
| C     | 2.50247                 | 2.06716  | 0.42721  | H | -1.2321  | 4.34665  | -1.35627 |
| C     | 1.63578                 | 2.45057  | -0.76088 | H | 0.41068  | 4.67331  | -1.9215  |
| C     | 1.88641                 | -3.05027 | -1.30183 | H | -0.44032 | 3.22884  | -2.47279 |
| C     | 0.60409                 | -2.80354 | -0.53682 | H | -4.96367 | -2.66983 | -0.47304 |
| C     | -0.11565                | -1.68351 | -0.75706 | H | -5.42611 | -1.04058 | -1.00188 |
| C     | 0.29276                 | 3.10836  | -0.40998 | H | -3.82835 | -1.70216 | -1.43996 |
| C     | -0.7214                 | 2.10725  | 0.19008  |   |          |          |          |
| C     | -1.37411                | -1.31105 | -0.1279  |   |          |          |          |

**Figure S6e.** Re-optimized conformers of (12*S*)-**1** calculated at the B3LYP/6-311G(d,p) level with IEFPCM solvent model for acetonitrile.

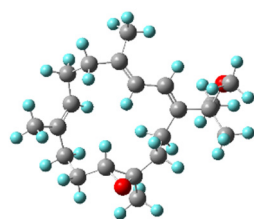

Conf. 1  
20.79%  
-971.16409466 a. u.

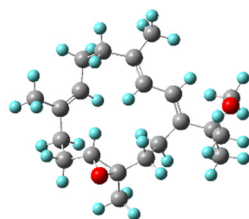

Conf. 2  
4.59%  
-971.16296862 a. u.

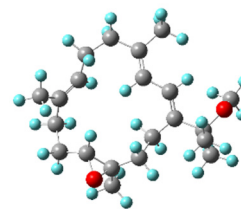

Conf. 3  
1.77%  
-971.15570297 a. u.

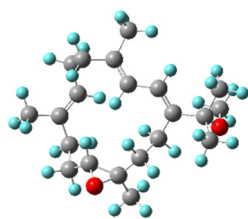

Conf. 4  
70.48%  
-971.16454601 a. u.

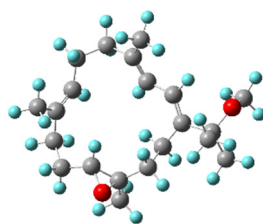

Conf. 5  
2.38%  
-971.15664626 a. u.

| Conf. 1 | Coordinates (Angstroms) |          |          |
|---------|-------------------------|----------|----------|
| atom    | X                       | Y        | Z        |
| C       | 2.66625                 | 2.8229   | 0.48781  |
| C       | 2.75898                 | 1.37958  | 0.91351  |
| C       | 3.6683                  | 0.46786  | 0.53723  |
| C       | 3.58609                 | -0.95919 | 1.05036  |
| C       | 3.33129                 | -2.03874 | -0.03037 |
| C       | 1.99554                 | -1.86952 | -0.71332 |
| C       | 1.6832                  | 3.0661   | -0.6958  |
| C       | 0.21718                 | 2.86385  | -0.35861 |
| C       | -0.31485                | 1.62531  | -0.37695 |
| C       | 0.75107                 | -2.60014 | -0.39352 |
| C       | -0.56942                | -1.90152 | -0.68544 |
| C       | -1.69395                | 1.23563  | -0.10426 |
| C       | -1.07988                | -1.10023 | 0.5387   |
| C       | -2.09184                | -0.00491 | 0.24365  |
| C       | -3.58057                | -0.30575 | 0.48778  |
| C       | -3.99074                | -1.697   | -0.03027 |
| C       | -3.88335                | -0.20656 | 1.99256  |
| O       | -4.42033                | 0.71554  | -0.09108 |
| C       | -0.54261                | 4.10767  | 0.01976  |
| C       | 4.82469                 | 0.7545   | -0.38989 |
| C       | 0.70001                 | -3.69314 | 0.65091  |
| O       | 1.52523                 | -2.93211 | -1.5752  |
| C       | -4.58758                | 0.69933  | -1.50497 |
| H       | 3.64636                 | 3.20202  | 0.18754  |
| H       | 2.34791                 | 3.43169  | 1.34166  |
| H       | 1.96953                 | 1.04265  | 1.58143  |
| H       | 4.5312                  | -1.2109  | 1.54774  |
| H       | 2.8023                  | -1.02726 | 1.81069  |
| H       | 3.40291                 | -3.02598 | 0.43023  |
| H       | 4.1161                  | -1.99798 | -0.79359 |
| H       | 1.86078                 | -0.88681 | -1.16359 |
| H       | 1.97244                 | 2.40272  | -1.5162  |
| H       | 1.83016                 | 4.09148  | -1.05143 |
| H       | 0.36625                 | 0.82032  | -0.63211 |
| H       | -0.42002                | -1.23168 | -1.53556 |
| H       | -1.31324                | -2.64355 | -0.99372 |
| H       | -2.46224                | 1.99458  | -0.20508 |
| H       | -0.21529                | -0.64032 | 1.02577  |
| H       | -1.49242                | -1.79736 | 1.27212  |
| H       | -5.06983                | -1.82114 | 0.09144  |
| H       | -3.74259                | -1.83621 | -1.08373 |
| H       | -3.49783                | -2.48708 | 0.53799  |
| H       | -4.92825                | -0.46698 | 2.18087  |
| H       | -3.24823                | -0.88093 | 2.57054  |
| H       | -3.70827                | 0.81492  | 2.33585  |
| H       | -0.57058                | 4.81355  | -0.81884 |
| H       | -1.56679                | 3.90503  | 0.33239  |
| H       | -0.038                  | 4.62775  | 0.84272  |

|   |          |          |          |
|---|----------|----------|----------|
| H | 5.76667  | 0.41489  | 0.0556   |
| H | 4.71689  | 0.21455  | -1.33699 |
| H | 4.92478  | 1.81303  | -0.62829 |
| H | -0.04222 | -4.44325 | 0.36064  |
| H | 1.66142  | -4.19439 | 0.75609  |
| H | 0.40906  | -3.2946  | 1.6263   |
| H | -5.22103 | -0.13186 | -1.83289 |
| H | -5.08359 | 1.63593  | -1.76417 |
| H | -3.6304  | 0.64947  | -2.03444 |

| Conf. 2 | Coordinates (Angstroms) |          |          |
|---------|-------------------------|----------|----------|
| atom    | X                       | Y        | Z        |
| C       | 2.52434                 | 2.92305  | 0.44295  |
| C       | 2.63295                 | 1.50382  | 0.9411   |
| C       | 3.58407                 | 0.60271  | 0.65242  |
| C       | 3.52069                 | -0.7983  | 1.23504  |
| C       | 3.3864                  | -1.94384 | 0.20205  |
| C       | 2.10019                 | -1.8708  | -0.58556 |
| C       | 1.62128                 | 3.08146  | -0.81635 |
| C       | 0.14402                 | 2.8296   | -0.57734 |
| C       | -0.33625                | 1.57043  | -0.59943 |
| C       | 0.86605                 | -2.63782 | -0.31583 |
| C       | -0.45437                | -2.01082 | -0.73972 |
| C       | -1.7175                 | 1.13055  | -0.42628 |
| C       | -1.05354                | -1.13008 | 0.38552  |
| C       | -2.09218                | -0.10819 | -0.04492 |
| C       | -3.58608                | -0.49323 | -0.06211 |
| C       | -3.9578                 | -1.03797 | -1.45157 |
| C       | -3.96242                | -1.53223 | 1.00815  |
| O       | -4.42123                | 0.68     | 0.06606  |
| C       | -0.6897                 | 4.04927  | -0.28752 |
| C       | 4.77582                 | 0.88114  | -0.23147 |
| C       | 0.78185                 | -3.6712  | 0.78537  |
| O       | 1.74009                 | -2.99896 | -1.41676 |
| C       | -4.47148                | 1.29943  | 1.34578  |
| H       | 3.51089                 | 3.32245  | 0.19388  |
| H       | 2.12815                 | 3.55743  | 1.24387  |
| H       | 1.82147                 | 1.17555  | 1.58663  |
| H       | 4.43859                 | -0.98299 | 1.80735  |
| H       | 2.69006                 | -0.85883 | 1.9447   |
| H       | 3.46119                 | -2.90078 | 0.72232  |
| H       | 4.22375                 | -1.9115  | -0.50365 |
| H       | 1.9595                  | -0.92078 | -1.09995 |
| H       | 1.99466                 | 2.40071  | -1.58682 |
| H       | 1.75373                 | 4.09844  | -1.20077 |
| H       | 0.39283                 | 0.78793  | -0.7836  |
| H       | -0.27412                | -1.40548 | -1.63156 |
| H       | -1.15687                | -2.80073 | -1.0278  |
| H       | -2.50466                | 1.84307  | -0.64958 |
| H       | -0.22989                | -0.59027 | 0.86007  |
| H       | -1.46502                | -1.77731 | 1.16138  |

|   |          |          |          |
|---|----------|----------|----------|
| H | -5.01004 | -1.3353  | -1.46653 |
| H | -3.79963 | -0.26443 | -2.20542 |
| H | -3.34701 | -1.90465 | -1.71174 |
| H | -5.04874 | -1.64934 | 1.02171  |
| H | -3.52477 | -2.50512 | 0.77809  |
| H | -3.63268 | -1.24342 | 2.00812  |
| H | -0.68422 | 4.73425  | -1.14369 |
| H | -1.72501 | 3.81061  | -0.04452 |
| H | -0.26732 | 4.60794  | 0.5561   |
| H | 5.70296  | 0.57746  | 0.26772  |
| H | 4.72233  | 0.30671  | -1.1629  |
| H | 4.86559  | 1.93277  | -0.50258 |
| H | 0.0808   | -4.46027 | 0.49631  |
| H | 1.74945  | -4.13377 | 0.97599  |
| H | 0.42101  | -3.22766 | 1.71703  |
| H | -3.47189 | 1.51527  | 1.73842  |
| H | -5.00666 | 2.24049  | 1.21006  |
| H | -5.01744 | 0.69135  | 2.07533  |

| Conf. | Coordinates (Angstroms) |          |          |
|-------|-------------------------|----------|----------|
| 3     |                         |          |          |
| atom  | X                       | Y        | Z        |
| C     | -2.32811                | 2.91043  | 0.33956  |
| C     | -2.66468                | 1.68257  | -0.48236 |
| C     | -3.60816                | 0.77504  | -0.19737 |
| C     | -3.78586                | -0.46169 | -1.05609 |
| C     | -3.60103                | -1.79637 | -0.2927  |
| C     | -2.27775                | -1.88004 | 0.43015  |
| C     | -1.1136                 | 3.71846  | -0.14388 |
| C     | 0.27165                 | 3.10883  | -0.02445 |
| C     | 0.47974                 | 1.79188  | 0.17428  |
| C     | -1.06849                | -2.6031  | -0.01355 |
| C     | 0.27346                 | -2.08493 | 0.48321  |
| C     | 1.76983                 | 1.11302  | 0.29006  |
| C     | 0.92159                 | -1.09784 | -0.5174  |
| C     | 2.00353                 | -0.1919  | 0.03966  |
| C     | 3.40392                 | -0.77688 | 0.32713  |
| C     | 3.48456                 | -1.22972 | 1.79479  |
| C     | 3.76787                 | -1.95498 | -0.59185 |
| O     | 4.4193                  | 0.24981  | 0.24669  |
| C     | 1.38256                 | 4.1132   | -0.20282 |
| C     | -4.53472                | 0.89971  | 0.9885   |
| C     | -1.03717                | -3.42766 | -1.28078 |
| O     | -1.91308                | -3.14179 | 1.03648  |
| C     | 4.74132                 | 0.73925  | -1.04968 |
| H     | -2.16891                | 2.62654  | 1.3867   |
| H     | -3.18682                | 3.59327  | 0.34857  |
| H     | -2.06116                | 1.52236  | -1.37344 |
| H     | -4.79473                | -0.4682  | -1.48795 |
| H     | -3.08213                | -0.42389 | -1.89296 |
| H     | -3.71555                | -2.62802 | -0.99069 |
| H     | -4.39699                | -1.90831 | 0.45228  |
| H     | -2.09343                | -1.0363  | 1.09413  |
| H     | -1.10372                | 4.66885  | 0.40432  |
| H     | -1.26703                | 4.00671  | -1.19486 |
| H     | -0.39723                | 1.1608   | 0.2546   |
| H     | 0.11019                 | -1.58705 | 1.44277  |
| H     | 0.93613                 | -2.93624 | 0.67429  |
| H     | 2.61898                 | 1.70629  | 0.61265  |
| H     | 0.13025                 | -0.47184 | -0.93415 |
| H     | 1.32394                 | -1.66253 | -1.36305 |
| H     | 4.4722                  | -1.65215 | 1.99954  |
| H     | 3.32485                 | -0.374   | 2.45351  |
| H     | 2.72901                 | -1.98434 | 2.01943  |
| H     | 4.80393                 | -2.24622 | -0.40286 |
| H     | 3.13431                 | -2.8198  | -0.38765 |

|   |          |          |          |
|---|----------|----------|----------|
| H | 3.66654  | -1.70808 | -1.65046 |
| H | 1.34741  | 4.87184  | 0.58779  |
| H | 2.37379  | 3.66187  | -0.20076 |
| H | 1.26093  | 4.64985  | -1.15111 |
| H | -4.2847  | 0.18116  | 1.77782  |
| H | -4.50888 | 1.89533  | 1.4318   |
| H | -5.56743 | 0.68727  | 0.69073  |
| H | -0.34486 | -4.26647 | -1.15838 |
| H | -2.02034 | -3.83368 | -1.5164  |
| H | -0.69578 | -2.83252 | -2.13164 |
| H | 5.28717  | -0.00115 | -1.64444 |
| H | 3.85051  | 1.05504  | -1.60337 |
| H | 5.38687  | 1.60579  | -0.89863 |

| Conf. 4 | Coordinates (Angstroms) |          |          |
|---------|-------------------------|----------|----------|
| atom    | X                       | Y        | Z        |
| C       | 2.71426                 | 2.74152  | 0.50437  |
| C       | 2.68641                 | 1.31639  | 0.99462  |
| C       | 3.57826                 | 0.34549  | 0.7466   |
| C       | 3.36337                 | -1.05446 | 1.29458  |
| C       | 3.17382                 | -2.1575  | 0.22466  |
| C       | 1.95419                 | -1.9228  | -0.63418 |
| C       | 1.8808                  | 2.97252  | -0.79195 |
| C       | 0.37907                 | 2.85996  | -0.60925 |
| C       | -0.21875                | 1.65283  | -0.66844 |
| C       | 0.63643                 | -2.57518 | -0.48475 |
| C       | -0.5888                 | -1.80733 | -0.95941 |
| C       | -1.64073                | 1.35406  | -0.53095 |
| C       | -1.24631                | -1.00804 | 0.19443  |
| C       | -2.15078                | 0.14849  | -0.20378 |
| C       | -3.66196                | -0.1126  | -0.13094 |
| C       | -4.53165                | 1.12725  | -0.37995 |
| C       | -4.06448                | -1.21203 | -1.12621 |
| O       | -3.99354                | -0.69555 | 1.1594   |
| C       | -0.3388                 | 4.15334  | -0.32821 |
| C       | 4.83735                 | 0.53673  | -0.06363 |
| C       | 0.38211                 | -3.64934 | 0.54967  |
| O       | 1.54433                 | -2.96665 | -1.54761 |
| C       | -3.76399                | 0.11613  | 2.3038   |
| H       | 3.73897                 | 3.06216  | 0.3004   |
| H       | 2.33501                 | 3.4033   | 1.29118  |
| H       | 1.81562                 | 1.04712  | 1.58812  |
| H       | 4.23113                 | -1.33514 | 1.90463  |
| H       | 2.49586                 | -1.05348 | 1.96132  |
| H       | 3.11494                 | -3.12838 | 0.72058  |
| H       | 4.05156                 | -2.19876 | -0.4297  |
| H       | 1.93976                 | -0.9393  | -1.10181 |
| H       | 2.21889                 | 2.25435  | -1.54439 |
| H       | 2.12057                 | 3.97043  | -1.17432 |
| H       | 0.43626                 | 0.80513  | -0.83718 |
| H       | -0.28064                | -1.13508 | -1.76362 |
| H       | -1.30682                | -2.50998 | -1.39483 |
| H       | -2.32474                | 2.17231  | -0.72465 |
| H       | -0.44662                | -0.60915 | 0.82624  |
| H       | -1.81867                | -1.69076 | 0.82473  |
| H       | -5.57833                | 0.85874  | -0.21981 |
| H       | -4.28472                | 1.95413  | 0.28753  |
| H       | -4.42508                | 1.47972  | -1.40784 |
| H       | -5.13673                | -1.40658 | -1.043   |
| H       | -3.84115                | -0.90547 | -2.1502  |
| H       | -3.53531                | -2.14224 | -0.9155  |
| H       | -0.24271                | 4.84001  | -1.17749 |
| H       | -1.39876                | 4.02067  | -0.11244 |
| H       | 0.11586                 | 4.66107  | 0.53061  |
| H       | 4.80001                 | -0.03598 | -0.99685 |
| H       | 5.01606                 | 1.57848  | -0.32838 |

|       |                         |          |          |   |          |          |          |
|-------|-------------------------|----------|----------|---|----------|----------|----------|
| H     | 5.70935                 | 0.17101  | 0.49048  | H | -3.55519 | 3.52596  | -0.63007 |
| H     | -0.37232                | -4.34889 | 0.17632  | H | -2.51568 | 1.2447   | -1.67381 |
| H     | 1.28684                 | -4.21492 | 0.76915  | H | -4.851   | -0.99888 | -1.08466 |
| H     | 0.00726                 | -3.21972 | 1.48216  | H | -3.22671 | -0.83942 | -1.73621 |
| H     | -3.9501                 | -0.51777 | 3.17189  | H | -3.50988 | -2.98352 | -0.57197 |
| H     | -2.73222                | 0.48402  | 2.34796  | H | -4.04698 | -2.19293 | 0.89232  |
| H     | -4.4444                 | 0.97406  | 2.34777  | H | -1.77713 | -1.12272 | 1.17093  |
|       |                         |          |          | H | -1.44894 | 4.58104  | -0.62035 |
| Conf. | Coordinates (Angstroms) |          |          | H | -1.34371 | 3.31583  | -1.83192 |
| 5     |                         |          |          | H | 0.       | 1.38053  | -1.39836 |
| atom  | X                       | Y        | Z        | H | 0.45596  | -1.47578 | 1.27331  |
| C     | -2.74365                | 2.89377  | -0.24394 | H | 1.28695  | -2.84227 | 0.54903  |
| C     | -2.9617                 | 1.47411  | -0.70675 | H | 2.38997  | 1.93029  | 0.45486  |
| C     | -3.65815                | 0.49382  | -0.11673 | H | 0.32406  | -0.5869  | -1.24049 |
| C     | -3.79944                | -0.85324 | -0.80413 | H | 1.66604  | -1.67226 | -1.51481 |
| C     | -3.37848                | -2.0826  | 0.03078  | H | 4.45152  | -1.0303  | 2.16833  |
| C     | -1.96733                | -2.00523 | 0.56033  | H | 3.10447  | 0.10521  | 2.3888   |
| C     | -1.40857                | 3.49487  | -0.75368 | H | 2.77743  | -1.59829 | 2.02998  |
| C     | -0.16368                | 2.96332  | -0.06947 | H | 5.10691  | -1.78187 | -0.1312  |
| C     | 0.4542                  | 1.85996  | -0.53543 | H | 3.51325  | -2.53252 | -0.25247 |
| C     | -0.76171                | -2.64011 | -0.01546 | H | 4.07266  | -1.45499 | -1.53268 |
| C     | 0.58461                 | -2.02798 | 0.33954  | H | -0.53943 | 3.80927  | 1.87046  |
| C     | 1.69175                 | 1.26175  | -0.03973 | H | 1.12629  | 3.26458  | 1.65987  |
| C     | 1.16222                 | -1.08015 | -0.74601 | H | 0.56044  | 4.75482  | 0.88258  |
| C     | 2.08777                 | -0.01955 | -0.18419 | H | -4.00877 | -0.0414  | 1.95423  |
| C     | 3.48928                 | -0.42841 | 0.32405  | H | -4.31837 | 1.6595   | 1.59693  |
| C     | 3.44845                 | -0.7637  | 1.82439  | H | -5.45249 | 0.41384  | 1.06654  |
| C     | 4.07555                 | -1.61926 | -0.45346 | H | -0.05945 | -4.29186 | -1.18908 |
| O     | 4.39928                 | 0.69547  | 0.27288  | H | -1.78105 | -3.95286 | -1.40378 |
| C     | 0.28243                 | 3.72818  | 1.14927  | H | -0.57011 | -2.89858 | -2.15026 |
| C     | -4.38929                | 0.64949  | 1.19422  | H | 5.36799  | 2.06365  | -0.85567 |
| C     | -0.80357                | -3.49263 | -1.26266 | H | 5.48169  | 0.41443  | -1.50008 |
| O     | -1.4236                 | -3.21204 | 1.14307  | H | 3.96633  | 1.33955  | -1.6746  |
| C     | 4.81602                 | 1.136    | -1.01413 |   |          |          |          |
| H     | -2.79282                | 2.97221  | 0.84574  |   |          |          |          |

**Figure S6f.** Re-optimized conformers of (11*R*, 12*R*)-**2** calculated at the B3LYP/6-311G(d,p) level with IEFPCM solvent model for acetonitrile.

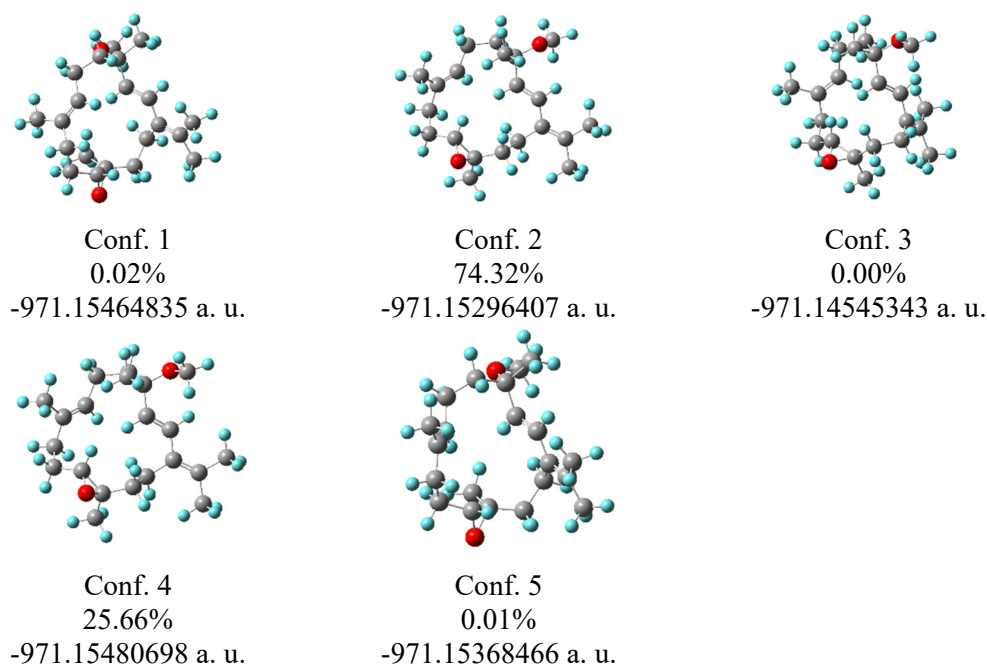

| Conf. 1<br>atom | Coordinates (Angstroms) |          |          |
|-----------------|-------------------------|----------|----------|
|                 | X                       | Y        | Z        |
| C               | -2.26388                | 2.17362  | -0.8949  |
| C               | -0.82079                | 2.05678  | -1.32887 |
| C               | 0.2131                  | 2.82783  | -0.95775 |
| C               | 1.56693                 | 2.67386  | -1.62539 |
| C               | 2.76526                 | 2.36661  | -0.70213 |
| C               | 2.91193                 | 0.91849  | -0.27961 |
| C               | -3.09656                | 0.89481  | -1.08702 |
| C               | -2.98224                | -0.17854 | 0.02399  |
| C               | -1.54976                | -0.63551 | 0.25064  |
| C               | 2.5759                  | 0.32229  | 1.03506  |
| C               | 2.46611                 | -1.19503 | 1.16704  |
| C               | -0.97823                | -1.73547 | -0.26985 |
| C               | 1.06434                 | -1.8439  | 1.29483  |
| C               | 0.36293                 | -2.27754 | 0.00686  |
| C               | 0.88969                 | -3.24783 | -0.78752 |
| C               | 2.1513                  | -4.01043 | -0.45278 |
| C               | 0.28153                 | -3.69845 | -2.09766 |
| C               | -3.93687                | -1.33503 | -0.32156 |
| C               | 0.09277                 | 3.96307  | 0.03242  |
| C               | 1.94927                 | 1.13654  | 2.14858  |
| O               | 3.93843                 | 0.68426  | 0.70072  |
| O               | -3.43852                | 0.51303  | 1.20874  |
| C               | -3.53823                | -0.25286 | 2.39481  |
| H               | -2.74152                | 2.96365  | -1.4955  |
| H               | -2.35388                | 2.49543  | 0.14747  |
| H               | -0.62889                | 1.29273  | -2.08402 |
| H               | 1.50529                 | 1.90434  | -2.4062  |
| H               | 1.79483                 | 3.61653  | -2.14674 |
| H               | 2.75663                 | 3.01536  | 0.1788   |
| H               | 3.68968                 | 2.61579  | -1.24184 |
| H               | 2.94598                 | 0.21981  | -1.12247 |
| H               | -2.84226                | 0.42538  | -2.04625 |
| H               | -4.15697                | 1.17123  | -1.13682 |
| H               | -0.98096                | 0.03102  | 0.8952   |
| H               | 3.01702                 | -1.63806 | 0.33346  |
| H               | 3.03831                 | -1.44614 | 2.07189  |
| H               | -1.58957                | -2.34067 | -0.9335  |
| H               | 0.40578                 | -1.1855  | 1.86662  |
| H               | 1.17717                 | -2.73608 | 1.92515  |
| H               | 2.00687                 | -5.07794 | -0.66883 |
| H               | 2.99866                 | -3.68584 | -1.07424 |
| H               | 2.45563                 | -3.9216  | 0.59233  |
| H               | -0.15908                | -4.7024  | -2.00611 |
| H               | -0.48256                | -3.02479 | -2.48869 |
| H               | 1.0652                  | -3.77798 | -2.86332 |
| H               | -3.86082                | -2.15699 | 0.3963   |
| H               | -4.96821                | -0.96719 | -0.32631 |
| H               | -3.71937                | -1.73998 | -1.31514 |
| H               | -0.91791                | 4.06422  | 0.43393  |
| H               | 0.77552                 | 3.8394   | 0.88252  |
| H               | 0.35953                 | 4.91822  | -0.44253 |
| H               | 2.22954                 | 0.72293  | 3.12515  |
| H               | 2.28874                 | 2.17381  | 2.11775  |
| H               | 0.8557                  | 1.13181  | 2.07958  |
| H               | -2.61153                | -0.80135 | 2.61736  |
| H               | -3.73137                | 0.4568   | 3.20446  |
| H               | -4.36738                | -0.97416 | 2.35946  |

  

| Conf. 2<br>atom | Coordinates (Angstroms) |         |          |
|-----------------|-------------------------|---------|----------|
|                 | X                       | Y       | Z        |
| C               | -1.59768                | 3.09968 | -0.51245 |

  

| Conf. 3<br>atom | Coordinates (Angstroms) |         |          |
|-----------------|-------------------------|---------|----------|
|                 | X                       | Y       | Z        |
| C               | -2.3879                 | 2.03634 | 1.144    |
| C               | -0.90013                | 1.92135 | 1.36974  |
| C               | 0.06853                 | 2.79233 | 1.04321  |
| C               | 1.51699                 | 2.47233 | 1.37214  |
| C               | 2.46439                 | 2.411   | 0.15085  |
| C               | 2.00669                 | 1.43685 | -0.91348 |
| C               | -3.10493                | 0.69501 | 0.8945   |

  

| Conf. 4<br>atom | Coordinates (Angstroms) |          |          |
|-----------------|-------------------------|----------|----------|
|                 | X                       | Y        | Z        |
| C               | -2.1291                 | 1.75253  | -0.93882 |
| C               | -3.15764                | 1.05795  | -0.42315 |
| C               | -3.57027                | -0.27027 | -1.03604 |
| C               | -3.58005                | -1.47059 | -0.06025 |
| C               | -2.24029                | -1.69934 | 0.60205  |
| C               | -0.06665                | 3.28432  | -0.62148 |
| C               | 0.85647                 | 2.51831  | 0.37018  |
| C               | 0.97175                 | 1.04282  | 0.01942  |
| C               | -1.23242                | -2.72017 | 0.23255  |
| C               | 0.22225                 | -2.42095 | 0.56728  |
| C               | 2.107                   | 0.32603  | 0.10759  |
| C               | 1.0296                  | -1.85771 | -0.62668 |
| C               | 2.27985                 | -1.10172 | -0.20016 |
| C               | 3.48676                 | -1.71815 | -0.08253 |
| C               | 3.69951                 | -3.19461 | -0.32909 |
| C               | 4.77426                 | -1.03249 | 0.31718  |
| C               | 0.35629                 | 2.66556  | 1.8171   |
| C               | -4.0036                 | 1.52994  | 0.7369   |
| C               | -1.46581                | -3.73414 | -0.869   |
| O               | -2.07543                | -2.88778 | 1.39556  |
| O               | 2.1533                  | 3.14985  | 0.40508  |
| C               | 2.80884                 | 3.37423  | -0.83244 |
| H               | -1.92818                | 3.35423  | 0.49907  |
| H               | -2.03998                | 3.86635  | -1.16878 |
| H               | -1.62382                | 1.32388  | -1.80694 |
| H               | -4.58549                | -0.1735  | -1.45029 |
| H               | -2.90989                | -0.50012 | -1.88149 |
| H               | -3.9043                 | -2.36817 | -0.59616 |
| H               | -4.32486                | -1.30532 | 0.7297   |
| H               | -1.84296                | -0.80601 | 1.0913   |
| H               | 0.14445                 | 4.34971  | -0.46358 |
| H               | 0.2393                  | 3.05323  | -1.65035 |
| H               | 0.03716                 | 0.57842  | -0.2804  |
| H               | 0.24213                 | -1.7049  | 1.39561  |
| H               | 0.70314                 | -3.33661 | 0.93833  |
| H               | 2.98187                 | 0.86682  | 0.45313  |
| H               | 0.3886                  | -1.18027 | -1.20243 |
| H               | 1.28313                 | -2.66689 | -1.31709 |
| H               | 4.3683                  | -3.35378 | -1.18779 |
| H               | 4.20113                 | -3.65221 | 0.53515  |
| H               | 2.78245                 | -3.75699 | -0.50883 |
| H               | 5.11364                 | -1.38799 | 1.30083  |
| H               | 5.57161                 | -1.29199 | -0.39312 |
| H               | 4.71568                 | 0.05522  | 0.35969  |
| H               | 0.18861                 | 3.72112  | 2.06138  |
| H               | -0.57405                | 2.11186  | 1.97531  |
| H               | 1.11345                 | 2.26649  | 2.49778  |
| H               | -5.06537                | 1.54276  | 0.45396  |
| H               | -3.92188                | 0.85733  | 1.6008   |
| H               | -3.7405                 | 2.53463  | 1.07417  |
| H               | -0.95246                | -4.67231 | -0.62404 |
| H               | -2.52757                | -3.96    | -0.98958 |
| H               | -1.0729                 | -3.37902 | -1.82874 |
| H               | 2.84277                 | 2.47318  | -1.45893 |
| H               | 2.34684                 | 4.18804  | -1.40852 |
| H               | 3.83264                 | 3.66881  | -0.58318 |

|   |          |          |          |
|---|----------|----------|----------|
| C | -2.79688 | -0.08391 | -0.41364 |
| C | -1.33511 | -0.51478 | -0.48226 |
| C | 2.57096  | 0.09513  | -1.19659 |
| C | 1.70786  | -0.92906 | -1.92954 |
| C | -0.85454 | -1.60886 | 0.12617  |
| C | 1.28494  | -2.2169  | -1.17797 |
| C | 0.54188  | -2.12231 | 0.15169  |
| C | 1.03424  | -2.63505 | 1.30909  |
| C | 2.36396  | -3.33619 | 1.47604  |
| C | 0.27489  | -2.57873 | 2.61841  |
| C | -3.16305 | 0.75469  | -1.64974 |
| C | -0.17516 | 4.12308  | 0.37     |
| C | 3.7619   | -0.44763 | -0.435   |
| O | 2.87421  | 1.23411  | -2.04053 |
| O | -3.6688  | -1.22503 | -0.27904 |
| C | -3.77474 | -2.09638 | -1.39121 |
| H | -2.61502 | 2.74197  | 0.33697  |
| H | -2.8521  | 2.46697  | 2.04567  |
| H | -0.59412 | 1.01019  | 1.88354  |
| H | 1.91365  | 3.23609  | 2.05849  |
| H | 1.56169  | 1.51631  | 1.90759  |
| H | 3.47549  | 2.16596  | 0.49114  |
| H | 2.536    | 3.40204  | -0.31745 |
| H | 0.96456  | 1.5848   | -1.20582 |
| H | -4.18815 | 0.86879  | 0.90397  |
| H | -2.89355 | 0.01101  | 1.72582  |
| H | -0.67582 | 0.15937  | -1.01844 |
| H | 0.83139  | -0.41708 | -2.3372  |
| H | 2.28838  | -1.25697 | -2.8041  |
| H | -1.58689 | -2.20601 | 0.66909  |
| H | 2.17665  | -2.83435 | -1.05113 |
| H | 0.64191  | -2.77201 | -1.87602 |
| H | 3.00655  | -2.79167 | 2.1823   |
| H | 2.20489  | -4.33061 | 1.91744  |
| H | 2.92974  | -3.47448 | 0.55417  |
| H | 0.91639  | -2.16618 | 3.40949  |
| H | -0.6272  | -1.96701 | 2.5777   |
| H | -0.00901 | -3.58812 | 2.95084  |
| H | -4.22275 | 1.03127  | -1.62241 |
| H | -2.56664 | 1.67219  | -1.68314 |
| H | -2.97026 | 0.21062  | -2.58005 |
| H | 0.24228  | 4.94029  | 0.97501  |
| H | 0.31754  | 4.18237  | -0.60975 |
| H | -1.23662 | 4.3342   | 0.22074  |
| H | 4.33382  | -1.13573 | -1.07015 |
| H | 4.43458  | 0.35805  | -0.13314 |
| H | 3.44484  | -0.99524 | 0.45742  |
| H | -4.33367 | -1.64494 | -2.22298 |
| H | -2.79266 | -2.42265 | -1.75825 |
| H | -4.32797 | -2.97194 | -1.03934 |

| Conf. | Coordinates (Angstroms) |          |          |
|-------|-------------------------|----------|----------|
| 4     |                         |          |          |
| atom  | X                       | Y        | Z        |
| C     | 1.46486                 | -2.93532 | -1.18977 |
| C     | 1.99022                 | -1.52422 | -1.29073 |
| C     | 3.05749                 | -0.98121 | -0.67741 |
| C     | 3.48121                 | 0.44645  | -0.98677 |
| C     | 3.51907                 | 1.41569  | 0.22027  |
| C     | 2.16082                 | 1.5887   | 0.86049  |
| C     | -0.06645                | -3.10074 | -1.06747 |
| C     | -0.77933                | -2.53115 | 0.19484  |
| C     | -0.92613                | -1.0231  | 0.08453  |
| C     | 1.19685                 | 2.67618  | 0.57865  |
| C     | -0.28314                | 2.35704  | 0.741    |
| C     | -2.05938                | -0.37544 | -0.2376  |

|   |          |          |          |
|---|----------|----------|----------|
| C | -0.91732 | 1.8659   | -0.58435 |
| C | -2.21005 | 1.07886  | -0.41934 |
| C | -3.43067 | 1.67645  | -0.45299 |
| C | -3.63236 | 3.16402  | -0.63004 |
| C | -4.74787 | 0.95242  | -0.28828 |
| C | -0.0069  | -2.90176 | 1.47399  |
| C | 3.95209  | -1.7176  | 0.29392  |
| C | 1.52339  | 3.82931  | -0.34978 |
| O | 1.96576  | 2.65761  | 1.80356  |
| O | -2.06351 | -3.18308 | 0.14402  |
| C | -2.86539 | -3.14389 | 1.31195  |
| H | 1.95497  | -3.4794  | -0.37667 |
| H | 1.74978  | -3.46858 | -2.11075 |
| H | 1.44543  | -0.89172 | -1.99452 |
| H | 4.49175  | 0.42558  | -1.42262 |
| H | 2.81999  | 0.86309  | -1.75666 |
| H | 3.91182  | 2.3829   | -0.10851 |
| H | 4.21991  | 1.04659  | 0.98064  |
| H | 1.72398  | 0.64627  | 1.20113  |
| H | -0.28601 | -4.17534 | -1.07711 |
| H | -0.5617  | -2.67372 | -1.94766 |
| H | -0.00441 | -0.47519 | 0.25656  |
| H | -0.38819 | 1.59093  | 1.51614  |
| H | -0.81884 | 3.24404  | 1.10582  |
| H | -2.93906 | -0.99062 | -0.39502 |
| H | -0.193   | 1.22355  | -1.09862 |
| H | -1.07184 | 2.72046  | -1.24902 |
| H | -4.25698 | 3.36704  | -1.51213 |
| H | -4.17729 | 3.5787   | 0.22998  |
| H | -2.70736 | 3.73261  | -0.73473 |
| H | -5.27785 | 1.3262   | 0.59953  |
| H | -5.40536 | 1.15656  | -1.14517 |
| H | -4.66026 | -0.1291  | -0.18437 |
| H | 0.11872  | -3.98839 | 1.54753  |
| H | 0.98408  | -2.43888 | 1.46777  |
| H | -0.52344 | -2.54946 | 2.37168  |
| H | 4.9954   | -1.68981 | -0.05034 |
| H | 3.94304  | -1.24995 | 1.28735  |
| H | 3.67543  | -2.76619 | 0.42127  |
| H | 1.00551  | 4.73467  | -0.00964 |
| H | 2.59374  | 4.04557  | -0.36203 |
| H | 1.19717  | 3.62397  | -1.37586 |
| H | -2.48622 | -3.81165 | 2.09832  |
| H | -2.96016 | -2.13105 | 1.72548  |
| H | -3.8569  | -3.49539 | 1.01084  |

| Conf. 5 | Coordinates (Angstroms) |          |          |
|---------|-------------------------|----------|----------|
| atom    | X                       | Y        | Z        |
| C       | 2.48295                 | 1.94953  | -0.15239 |
| C       | 1.00229                 | 2.21438  | 0.0199   |
| C       | 0.41274                 | 2.76993  | 1.08915  |
| C       | -1.07178                | 3.07335  | 1.17035  |
| C       | -1.95805                | 2.83417  | -0.06362 |
| C       | -2.49469                | 1.42259  | -0.23623 |
| C       | 3.04167                 | 0.69635  | 0.559    |
| C       | 2.79376                 | -0.67043 | -0.12614 |
| C       | 1.3146                  | -0.96387 | -0.31934 |
| C       | -2.36655                | 0.53016  | -1.41673 |
| C       | -2.66268                | -0.95924 | -1.26242 |
| C       | 0.53035                 | -1.66665 | 0.51592  |
| C       | -1.48272                | -1.93948 | -1.06551 |
| C       | -0.88286                | -2.03473 | 0.33693  |
| C       | -1.59785                | -2.55317 | 1.37207  |
| C       | -2.98888                | -3.12631 | 1.22515  |
| C       | -1.10006                | -2.63302 | 2.79919  |
| C       | 3.51843                 | -1.75557 | 0.69132  |

|   |          |          |          |   |          |          |          |
|---|----------|----------|----------|---|----------|----------|----------|
| C | 1.16561  | 3.18623  | 2.33248  | H | -1.84536 | -2.93615 | -1.34912 |
| C | -1.59397 | 0.92719  | -2.65778 | H | -3.067   | -4.06192 | 1.79566  |
| O | -3.56377 | 1.31008  | -1.19227 | H | -3.74901 | -2.45023 | 1.64319  |
| O | 3.41055  | -0.52225 | -1.42392 | H | -3.27173 | -3.34265 | 0.19283  |
| C | 3.433    | -1.66929 | -2.25251 | H | -1.8937  | -2.31349 | 3.48794  |
| H | 3.05144  | 2.81135  | 0.21949  | H | -0.85412 | -3.66908 | 3.07573  |
| H | 2.72002  | 1.87108  | -1.21829 | H | -0.22798 | -2.00994 | 3.00289  |
| H | 0.37273  | 1.93603  | -0.8208  | H | 4.59703  | -1.56805 | 0.67052  |
| H | -1.5     | 2.53019  | 2.02932  | H | 3.19423  | -1.74127 | 1.73681  |
| H | -1.16699 | 4.13469  | 1.44686  | H | 3.32842  | -2.75866 | 0.29827  |
| H | -1.45707 | 3.18643  | -0.97089 | H | 0.98306  | 4.24484  | 2.56528  |
| H | -2.85079 | 3.46412  | 0.04601  | H | 0.82132  | 2.61505  | 3.20656  |
| H | -2.71082 | 0.92081  | 0.7128   | H | 2.24529  | 3.04241  | 2.24951  |
| H | 2.64362  | 0.64148  | 1.57868  | H | -2.11337 | 0.5535   | -3.54883 |
| H | 4.13139  | 0.80552  | 0.63836  | H | -1.51314 | 2.01231  | -2.75201 |
| H | 0.90576  | -0.52755 | -1.22773 | H | -0.58328 | 0.50425  | -2.66052 |
| H | -3.3789  | -1.0643  | -0.44255 | H | 4.13323  | -2.43542 | -1.88956 |
| H | -3.20142 | -1.25796 | -2.17378 | H | 2.43957  | -2.12979 | -2.35581 |
| H | 0.99694  | -2.05445 | 1.41684  | H | 3.76922  | -1.33191 | -3.2372  |
| H | -0.6946  | -1.71657 | -1.7898  |   |          |          |          |

**Figure S6g.** Re-optimized conformers of (4*S*, 11*R*, 12*R*)-**3** calculated at the B3LYP/6-311G(d,p) level with IEFPCM solvent model for acetonitrile.

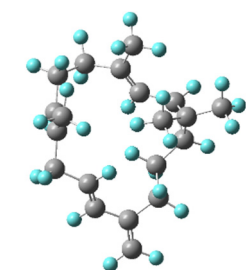

Conf. 1  
4.29%  
-780.12918558 a. u.

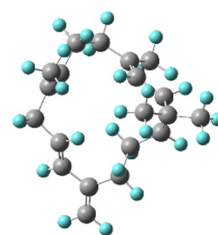

Conf. 2  
2.00%  
-780.13733449 a. u.

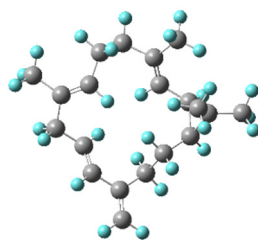

Conf. 3  
14.36%  
-780.13310085 a. u.

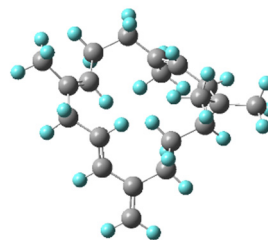

Conf. 4  
79.34%  
-780.13557317 a. u.

| Conf. 1<br>atom | Coordinates (Angstroms) |          |          |
|-----------------|-------------------------|----------|----------|
|                 | X                       | Y        | Z        |
| C               | -2.89044                | -0.76114 | -1.61945 |
| C               | -2.72948                | -2.05723 | -0.77478 |
| C               | -2.46782                | 0.51826  | -0.92405 |
| C               | -1.35037                | 1.15542  | -1.30125 |
| C               | 0.82019                 | -3.09002 | 0.60562  |
| C               | 1.67845                 | -1.84995 | 0.59005  |
| C               | 2.74323                 | -1.6453  | -0.19686 |
| C               | 3.4903                  | -0.38038 | -0.3276  |
| C               | 2.81247                 | 0.91378  | 0.08984  |
| C               | 1.59188                 | 1.20534  | -0.8127  |
| C               | -0.74181                | 2.40198  | -0.73756 |
| C               | 0.76948                 | 2.4381   | -0.48706 |
| C               | -0.19355                | 2.53781  | 0.68089  |
| C               | 4.7059                  | -0.3745  | -0.89749 |
| C               | -0.32819                | 3.9098   | 1.32242  |
| C               | -0.32833                | 1.40512  | 1.6811   |
| H               | -1.15837                | 3.32375  | -1.14123 |
| H               | 1.2597                  | 3.37461  | -0.74353 |

|   |          |          |          |
|---|----------|----------|----------|
| C | -3.38428 | 1.01018  | 0.167    |
| C | -1.2978  | -2.46829 | -0.55169 |
| C | -0.66397 | -2.71614 | 0.60193  |
| C | -1.28489 | -2.61456 | 1.97185  |
| H | -3.947   | -0.68365 | -1.90489 |
| H | -2.32084 | -0.87786 | -2.54695 |
| H | -3.23862 | -2.85935 | -1.32524 |
| H | -3.26707 | -1.95347 | 0.16998  |
| H | -0.80759 | 0.72074  | -2.13964 |
| H | 1.03094  | -3.68442 | 1.50419  |
| H | 1.06555  | -3.71772 | -0.25533 |
| H | 1.34667  | -1.05202 | 1.24816  |
| H | 3.08918  | -2.46278 | -0.82808 |
| H | 2.48994  | 0.85494  | 1.13433  |
| H | 3.5332   | 1.73433  | 0.03038  |
| H | 1.94902  | 1.29536  | -1.84628 |
| H | 0.94831  | 0.3267   | -0.80219 |
| H | 5.17372  | -1.29081 | -1.24344 |
| H | 5.26719  | 0.54408  | -1.02965 |
| H | -1.30493 | 4.0225   | 1.8062   |
| H | 0.44104  | 4.05914  | 2.08838  |
| H | -0.2255  | 4.70997  | 0.58471  |
| H | -1.26556 | 1.49806  | 2.23805  |
| H | -0.32683 | 0.42625  | 1.20427  |
| H | 0.48744  | 1.43807  | 2.41095  |
| H | -3.0459  | 1.95477  | 0.59172  |
| H | -4.39543 | 1.15683  | -0.23113 |
| H | -3.47404 | 0.28307  | 0.9809   |
| H | -0.71762 | -2.57997 | -1.46854 |
| H | -2.30626 | -2.23574 | 1.9563   |
| H | -1.29472 | -3.59734 | 2.45792  |
| H | -0.69163 | -1.95771 | 2.61836  |

| Conf. 2 | Coordinates (Angstroms) |          |          |
|---------|-------------------------|----------|----------|
| atom    | X                       | Y        | Z        |
| C       | 2.79185                 | 1.6769   | -1.17822 |
| C       | 2.13313                 | 2.57388  | -0.11303 |
| C       | 2.56493                 | 0.17615  | -1.12241 |
| C       | 1.89171                 | -0.42553 | -0.13087 |
| C       | -1.76193                | 2.79115  | 0.48725  |
| C       | -2.23552                | 1.36574  | 0.36184  |
| C       | -2.96916                | 0.86465  | -0.64052 |
| C       | -3.25069                | -0.56579 | -0.86549 |
| C       | -2.32651                | -1.59511 | -0.23478 |
| C       | -0.88604                | -1.44628 | -0.77665 |
| C       | 1.59395                 | -1.87953 | 0.00385  |
| C       | 0.16345                 | -2.40682 | -0.24864 |
| C       | 0.74366                 | -2.41142 | 1.15004  |
| C       | -4.23898                | -0.93602 | -1.69513 |
| C       | 1.14389                 | -3.76819 | 1.70889  |
| C       | 0.22595                 | -1.46989 | 2.22303  |
| H       | 2.38376                 | -2.54755 | -0.32553 |
| H       | 0.1277                  | -3.39122 | -0.70979 |
| C       | 3.16003                 | -0.56522 | -2.29467 |
| C       | 0.62745                 | 2.65539  | -0.2108  |
| C       | -0.25929                | 2.80551  | 0.78132  |
| C       | 0.09723                 | 2.92458  | 2.24099  |
| H       | 3.87542                 | 1.85703  | -1.156   |
| H       | 2.47378                 | 2.02679  | -2.17083 |
| H       | 2.55265                 | 3.57974  | -0.24961 |
| H       | 2.44684                 | 2.25769  | 0.88557  |
| H       | 1.49115                 | 0.21273  | 0.64788  |
| H       | -2.28951                | 3.3026   | 1.30205  |
| H       | -1.9866                 | 3.33762  | -0.43281 |
| H       | -1.86895                | 0.69298  | 1.1327   |
| H       | -3.36524                | 1.54774  | -1.39062 |

|   |          |          |          |
|---|----------|----------|----------|
| H | -2.32048 | -1.48435 | 0.85467  |
| H | -2.7095  | -2.59786 | -0.44474 |
| H | -0.92134 | -1.56201 | -1.86694 |
| H | -0.55794 | -0.42215 | -0.60828 |
| H | -4.87053 | -0.20266 | -2.1866  |
| H | -4.44505 | -1.98038 | -1.90271 |
| H | 1.92298  | -3.66206 | 2.47199  |
| H | 0.28734  | -4.26852 | 2.17421  |
| H | 1.53075  | -4.4253  | 0.92566  |
| H | -0.12285 | -0.51794 | 1.82485  |
| H | -0.60936 | -1.93038 | 2.7601   |
| H | 1.01038  | -1.25468 | 2.95697  |
| H | 3.02196  | -1.64413 | -2.2268  |
| H | 2.70539  | -0.22724 | -3.2335  |
| H | 4.23421  | -0.36257 | -2.38028 |
| H | 0.23417  | 2.58861  | -1.22554 |
| H | 1.16326  | 2.80665  | 2.43416  |
| H | -0.20665 | 3.90559  | 2.62537  |
| H | -0.44224 | 2.18036  | 2.83844  |

| Conf. 3 | Coordinates (Angstroms) |          |          |
|---------|-------------------------|----------|----------|
| atom    | X                       | Y        | Z        |
| C       | 0.49333                 | -3.06251 | -0.64017 |
| C       | 1.50303                 | -2.77987 | 0.51375  |
| C       | -0.8605                 | -2.38844 | -0.48416 |
| C       | -1.0733                 | -1.1538  | -0.96411 |
| C       | 3.55114                 | 0.5484   | 0.00252  |
| C       | 2.34564                 | 1.38296  | -0.31972 |
| C       | 2.01921                 | 2.55076  | 0.24812  |
| C       | 0.82749                 | 3.35812  | -0.06179 |
| C       | -0.33969                | 2.7149   | -0.78791 |
| C       | -1.14887                | 1.79171  | 0.15127  |
| C       | -2.32893                | -0.34114 | -0.95769 |
| C       | -2.34307                | 1.11747  | -0.50037 |
| C       | -3.15372                | 0.08037  | 0.25469  |
| C       | 0.75498                 | 4.62908  | 0.36582  |
| C       | -4.66258                | 0.1209   | 0.07436  |
| C       | -2.73644                | -0.28604 | 1.66979  |
| H       | -2.93751                | -0.51196 | -1.8457  |
| H       | -2.93089                | 1.78786  | -1.12426 |
| C       | -1.90853                | -3.21365 | 0.21786  |
| C       | 2.02041                 | -1.37068 | 0.45241  |
| C       | 3.26298                 | -0.93738 | 0.20214  |
| C       | 4.47752                 | -1.82041 | 0.06339  |
| H       | 0.34403                 | -4.14567 | -0.70352 |
| H       | 0.95964                 | -2.75168 | -1.57973 |
| H       | 2.31478                 | -3.50705 | 0.44365  |
| H       | 1.00278                 | -2.95898 | 1.47382  |
| H       | -0.24457                | -0.68885 | -1.49706 |
| H       | 4.07906                 | 0.95451  | 0.87466  |
| H       | 4.26533                 | 0.627    | -0.83125 |
| H       | 1.70537                 | 0.97485  | -1.09699 |
| H       | 2.68107                 | 2.96564  | 1.00717  |
| H       | -0.99652                | 3.49965  | -1.17433 |
| H       | 0.00882                 | 2.14571  | -1.65586 |
| H       | -0.47785                | 1.04255  | 0.57561  |
| H       | -1.49907                | 2.40071  | 0.99359  |
| H       | 1.56238                 | 5.08337  | 0.93117  |
| H       | -0.11054                | 5.24938  | 0.16004  |
| H       | -5.11032                | -0.8597  | 0.27175  |
| H       | -5.1176                 | 0.83807  | 0.76696  |
| H       | -4.93727                | 0.4175   | -0.94141 |
| H       | -3.27518                | -1.17368 | 2.01311  |
| H       | -1.66974                | -0.49322 | 1.75499  |
| H       | -2.97978                | 0.52925  | 2.36007  |
| H       | -2.86614                | -2.70068 | 0.28613  |

|   |          |          |          |
|---|----------|----------|----------|
| H | -2.0623  | -4.15628 | -0.32038 |
| H | -1.58822 | -3.48445 | 1.23069  |
| H | 1.24622  | -0.61612 | 0.55263  |
| H | 4.27588  | -2.86528 | 0.29779  |
| H | 4.88103  | -1.77128 | -0.95485 |
| H | 5.2764   | -1.47565 | 0.73023  |

  

| Conf. 4 | Coordinates (Angstroms) |          |          |
|---------|-------------------------|----------|----------|
| atom    | X                       | Y        | Z        |
| C       | 1.3532                  | -2.96762 | -0.27965 |
| C       | 2.55963                 | -2.0787  | -0.7012  |
| C       | -0.00588                | -2.47155 | -0.73342 |
| C       | -0.91153                | -2.0594  | 0.16625  |
| C       | 2.8657                  | 1.50737  | 0.94147  |
| C       | 1.45597                 | 1.92076  | 0.63694  |
| C       | 1.08512                 | 2.83225  | -0.27242 |
| C       | -0.2942                 | 3.17429  | -0.65903 |
| C       | -1.44838                | 2.30137  | -0.19611 |
| C       | -1.35847                | 0.86434  | -0.75854 |
| C       | -2.285                  | -1.52917 | -0.09851 |
| C       | -2.53168                | -0.05557 | -0.47342 |
| C       | -2.94292                | -0.57818 | 0.88911  |
| C       | -0.50938                | 4.22281  | -1.47089 |
| C       | -4.43356                | -0.75755 | 1.12857  |
| C       | -2.18892                | -0.16983 | 2.14275  |
| H       | -2.96138                | -2.23292 | -0.57872 |
| H       | -3.37097                | 0.09104  | -1.14933 |
| C       | -0.2597                 | -2.46862 | -2.21934 |
| C       | 2.43044                 | -0.64896 | -0.25253 |
| C       | 3.18846                 | 0.04854  | 0.60393  |

  

|   |          |          |          |
|---|----------|----------|----------|
| C | 4.41504  | -0.48007 | 1.30357  |
| H | 1.35524  | -3.05838 | 0.81058  |
| H | 1.52741  | -3.97293 | -0.68518 |
| H | 2.6451   | -2.09924 | -1.79483 |
| H | 3.46957  | -2.54426 | -0.31638 |
| H | -0.61727 | -2.1139  | 1.21261  |
| H | 3.05732  | 1.64718  | 2.01461  |
| H | 3.57786  | 2.16373  | 0.42497  |
| H | 0.69318  | 1.38518  | 1.19523  |
| H | 1.86377  | 3.37089  | -0.81131 |
| H | -1.47153 | 2.26238  | 0.89782  |
| H | -2.38729 | 2.76533  | -0.51168 |
| H | -1.24443 | 0.9306   | -1.84707 |
| H | -0.44453 | 0.39775  | -0.3988  |
| H | 0.30971  | 4.83538  | -1.83403 |
| H | -1.50804 | 4.49764  | -1.79205 |
| H | -4.61748 | -1.51842 | 1.89539  |
| H | -4.89243 | 0.17702  | 1.47001  |
| H | -4.94924 | -1.0707  | 0.21698  |
| H | -2.26967 | -0.94828 | 2.90984  |
| H | -1.12752 | 0.00277  | 1.96286  |
| H | -2.61154 | 0.74844  | 2.56235  |
| H | -1.26323 | -2.1187  | -2.46226 |
| H | 0.45663  | -1.82802 | -2.7456  |
| H | -0.13651 | -3.47651 | -2.63306 |
| H | 1.58648  | -0.12679 | -0.69235 |
| H | 4.6788   | -1.49251 | 0.99844  |
| H | 5.27758  | 0.16711  | 1.10559  |
| H | 4.27073  | -0.47992 | 2.39018  |

**Figure S6h.** Re-optimized conformers of (1*S*, 2*R*)-**4** calculated at the B3LYP/6-311G(d,p) level with IEFPCM solvent model for acetonitrile.
